# Supplementary material for: ProteINSIDE to Easily Investigate Proteomics Data from Ruminants: Application to Mine Proteome of Adipose and Muscle Tissues in Bovine Foetuses
Source: PLoS One. 2015 May 22;10(5):e0128086. doi: 10.1371/journal.pone.0128086 (PMC4441380; doi:10.1371/journal.pone.0128086)
Supplement: S1 Table — (XLSX) [file pone.0128086.s001.xlsx]

## Sheet: UniProt AC for 6 species
HUMAN	BOVINE	RAT	MOUSE	SHEEP	GOAT
P31946	P68250	P35213	Q9CQV8	P68251	Q95MI7
P62258	P62261	P62260	P62259	P62262	P10626
Q04917	P68509	P68511	P68510	P68253	Q9XT57
P61981	P68252	P61983	P61982	O77642	P85295
P31947	Q0VC36	P68255	O70456	P29361	Q32644
P27348	Q3SZI4	P63102	P68254	P00349	Q32643
P63104	P63103	P22282	P63101	P12725	A5YVD9
P30443	Q5E9H2	P22283	A2AIG8	Q28757	P18626
P01892	A4FV68	Q4QQT4	Q3UX83	P35342	P33049
P04439	Q32PI5	P36876	Q6PD03	Q28559	P33048
P13746	Q5E9Q7	P36877	Q61151	Q2TCH3	P02670
Q96QU6	P14893	P56932	Q60996	O62849	Q8SPQ0
Q4AC99	Q0V8K7	P97888	Q76MZ3	Q9GL10	Q36347
P30447	Q0VCA8	P22072	Q7TNP2	P60713	Q37430
P05534	Q2HJD7	P22071	Q6P1F6	Q9TU77	P79153
P18462	Q9N179	Q62878	Q6ZWR4	Q28927	Q9N0U7
P30450	Q0P5A7	P27364	Q925E7	Q9XT58	Q6YI21
P30512	Q75Z89	O35048	Q8BG02	P29330	O18809
P16188	O46411	Q91Y80	P24815	O77590	B3IWF7
P16189	Q05927	P46953	P26149	Q28929	B3IWF8
P10314	P14790	P29266	P26150	P51977	P82018
P30453	Q2TBQ8	P23571	Q61767	P30358	P85170
P16190	A6QR56	Q62622	Q61694	P14639	Q867B2
P30455	Q3SZR3	Q794F9	O35469	P52210	P24953
P30456	P34955	Q63003	Q9EQC1	Q6A1I3	P84911
P30457	Q2KJF1	P19327	P55194	O46541	P84910
P01891	P28800	P28564	Q06649	P56283	O97946
P10316	Q7SIH1	P28565	Q99LH9	O46540	P08757
P30459	Q28053	P30940	Q9Z131	P20757	P68215
Q09160	P28190	P14842	Q78JT3	P32262	P68117
P01889	Q1LZD0	P30994	Q99L13	A2SW69	Q8MIP2
P30460	Q0VC81	P08909	Q04841	O18851	Q8HY83
P30461	Q0P5B7	P35563	P48193	Q9N0N3	P04564
P30462	Q95JC7	Q9JJ16	Q60876	Q7M2U8	Q6T5B8
P30464	Q5E9N4	Q62758	Q80VV3	F7VJQ3	Q66NC0
P30466	Q148E0	P35364	P70445	P56401	Q6BEG7
P03989	F1MH24	P35365	Q9EST3	O62735	P81447
P30685	Q5BIS9	P31388	P10852	Q866S3	Q8WMW8
P18463	P58108	P32305	Q64264	P62297	P50426
Q95365	Q2LL38	Q6AYP7	P28334	Q09YI3	Q9TTY8
P30475	Q32PA8	P21588	Q61224	P04074	P0CH25
Q04826	Q3SZK1	D3Z9R8	Q02284	P05028	P0CH26
P30479	Q08DJ7	P85968	P35363	P17605	P13786
P30480	Q32LK1	P85971	Q02152	Q06056	P02077
P30481	A8E657	P27682	P34968	Q04680	P02078
P30483	Q2T9S8	P53369	P23979	Q9XT28	P02082
P30484	P33097	Q3T1L0	Q9JHJ5	O78752	P02105
P30485	P12344	P02764	P97288	Q9XT50	P02102
P30486	Q2HJ19	P17475	P30966	O78751	P67833
P30488	A5PKD9	Q9EPH1	P31387	Q28560	Q9TUG3
P30487	Q4GZT4	Q923K9	Q9R1C8	Q6QAT4	P62756
P18464	Q2KJA2	P14046	P32304	Q8HYZ0	P79154
P30490	Q08DW9	Q63041	A3KFX0	Q9N0M2	P28171
P30491	Q3SYR3	P06238	Q91YE9	Q9GKM4	P51457
P30492	Q3T0A0	A0A4Z3	Q9D020	Q6R6L0	O02814
P30493	Q5EA42	Q9JI93	Q3UFY7	B3F209	P68221
P30495	Q0VC00	P08592	Q3V1L4	Q9MZE2	Q3ZT29
P18465	Q5EA59	P25099	Q61503	O97967	P79161
P10319	Q1LZ86	P30543	P56379	P51663	P79162
Q29940	Q17QP1	P29276	Q9DCD0	Q95203	P36835
Q29836	Q5E9H9	P28647	Q9CQ60	P48282	P79155
Q31612	Q3SZ73	P63116	P12961	P00922	Q28319
P30498	A7YY28	Q9QZH8	P53368	P08060	P01319
Q31610	Q1JPD2	Q9JMI1	Q3UKZ7	P30881	Q5VI41
Q29718	Q3ZBN0	Q64602	Q571I9	P01261	Q6R650
P30499	A6QNS3	Q9R0Z7	Q8C0J2	Q6YNX6	Q6R649
P30501	Q148M8	P0C1X8	Q6KAU8	Q9TTH8	Q861R7
P04222	Q9TTS3	P80386	Q60590	P04653	Q28317
P30504	Q0NXR6	Q9QZH4	P07361	P04654	Q6R648
Q9TNN7	Q3SZB4	P80385	Q63805	P11839	Q6R645
Q29963	Q3ZBF6	P54645	P07758	P02669	P02447
P10321	P48818	Q09137	P22599	P83205	P02442
P30505	A5PK26	Q91ZF7	Q00896	Q9MZS8	P02756
P30508	Q2KHT9	Q5XI97	Q00897	Q10991	P00712
P30510	P07106	A2VCW9	Q00898	Q6B3Y2	Q257X2
Q07000	A2VDR2	P13221	Q9DCQ7	Q09YJ1	P37713
Q29960	Q3SZF0	Q9QYW0	Q19LI2	P49920	P37714
Q95604	Q2KHW5	P00507	Q5YD48	Q1WLP9	Q95327
Q29865	P07107	Q5XIJ5	Q61247	Q28565	P85297
Q15172	Q5EAD4	Q6AY17	Q6GQT1	Q29422	P56444
Q15173	Q58DD0	Q9ESR9	Q61838	P80943	B7U9B5
Q14738	P23795	Q8CF82	Q3V1N9	O62848	P54877
Q16537	P12820	Q7TNJ2	Q67BJ4	P18438	Q28314
Q13362	Q07263	O70595	P12023	P29328	Q36346
P30153	Q8SPU7	Q704E8	Q3UD01	P18439	Q7YBC1
P30154	P54131	Q5RKI8	Q60612	P29329	Q95170
P63151	P02709	Q9QYJ4	Q60613	P05542	P0C225
Q00005	Q8SPU6	O70127	Q60614	P58020	P80935
Q66LE6	P04758	Q09429	Q61618	B2MVY4	P80933
Q9Y2T4	P04759	Q63563	P63115	Q9N0J3	P80934
P04229	P02715	Q9QY44	Q99PG0	O77728	P85296
P01912	P13536	P16970	P58742	P49451	Q7M323
P13760	Q17R13	Q6MG08	P51912	P49453	P52113
P13761	Q9GLX0	Q66H39	Q9D2R0	Q9XT27	Q28318
Q30134	P35350	Q80W57	Q9WVM8	Q00555	Q28315
Q9TQE0	Q32KZ2	Q99PE7	Q9D1A0	Q6TMG6	Q9GK76
Q30167	Q32L91	P58428	Q8R2R3	P32753	A5JSS2
P20039	A4FUX8	Q6AYT7	Q3UHJ0	P18276	P67926
Q95IE3	Q32PF2	P38483	Q9R078	B1A8Z2	A5JST6
Q5Y7A7	P41985	P60705	O54950	C7A276	Q95M19
Q9GIY3	P41984	Q6AXX9	Q6PAM0	C7A278	A5JSS4
P01911	P41986	Q5RK23	Q91WG5	A2TJ54	P63293
Q29974	Q0II68	Q6QA69	Q8BGM7	P17698	Q5FB29
P14060	Q0P574	Q5XI64	Q8R0P4	Q7YRL2	P67931
P26439	Q0VCU1	Q5I0K5	Q5EG47	Q6B7M7	P85986
Q9H2F3	Q9TT94	Q5I0C4	Q8BRK8	P01191	P85985
Q9Y3L3	P20004	Q6DGG1	Q9D2V5	O78749	Q03256
P78314	Q3SWX2	Q6MG55	Q811W1	O78750	O02828
Q7L8J4	Q3SZP5	Q5XIL6	Q3THG9	O21619	Q0GC71
O60239	P80227	Q9QZM5	Q99K67	P80337	P13296
P46952	P52505	Q6KC51	Q7TSV6	P79202	Q29477
P31937	Q17QJ1	Q8K4K7	P05201	Q29497	P80601
P29372	Q58DN7	Q4KLM5	Q9JKX4	Q9XS28	A9YUB5
P11171	Q9BEA2	Q5XIU1	P05202	P56591	D3INW7
Q13541	A7MB45	O08764	Q99JW1	Q29496	P63290
Q13542	P62739	P11497	Q7M759	O62772	U5KFH4
O60516	P60712	P15650	Q8VCV1	P01142	U5KNS6
Q9NRA8	Q3ZC07	P08503	Q8R5A3	Q28557	U5KQ45
P08195	P63258	P15651	Q8K442	B3IWF9	W8EFA2
P08908	P34974	P45953	Q8K440	Q5ENZ0	I6TLB7
P28222	Q5E9B5	Q5FVC7	P41233	Q5ENY9	D0PQI3
P28221	Q2T9W4	Q6AYY8	P41234	P28773	A6XJN8
P28566	Q3B7N2	Q6DGF9	Q8R420	Q28746	O03565
P30939	Q3ZC55	A0FKI7	O35600	P16038	B2Y6D2
P28223	Q0III9	Q5RJK8	Q8K448	P54230	B7U4A2
P41595	A5D7D1	Q924N5	Q8K441	P79362	F8SXW5
P28335	P68138	A1L1K7	Q91V24	P50415	G8FGA4
P46098	Q2TA43	P11030	Q8K449	Q09YI1	G0YW73
O95264	A4IFE3	B3DMA2	Q5SSE9	P61903	G1DGF2
Q70Z44	Q28041	P70584	Q9DC29	P61901	Q0MT75
Q8WXA8	P46446	Q4FZR5	Q61102	Q9TR28	M1H6M2
A5X5Y0	P41500	Q5EGZ1	Q9CXJ4	Q9TR30	D0VEF6
Q13639	P07033	P37136	Q9JJ59	Q9TU17	A4ZG01
P47898	Q10741	P47820	Q9JI39	P55917	A3RI40
P50406	P18130	Q9JLB5	Q9QY30	P46691	U3MIT4
P34969	Q28838	P12389	P70170	Q28553	E7BTP9
Q9BXI3	O77700	P04757	P48410	Q95204	C5IS87
Q96P26	Q0VC13	P09483	Q61285	Q9ZZR4	B3VI23
Q9H0P0	O77780	P20420	P55096	P24959	C6ZEA2
Q969T7	Q5E9J7	P43143	Q64343	P62896	Q8MJX4
P49902	P56658	Q05941	Q8K268	Q10994	Q5QT37
P21589	Q29RI0	P43144	P61222	Q8HY31	D0PQK8
P56378	P19754	P25108	O89016	O19038	B2YKY1
P52209	Q29450	P12390	Q7TMS5	O19039	D1LYG9
O95336	Q3ZC42	P12391	Q99LE6	P51975	B5AFY0
P05408	Q2EMW0	P12392	Q6P542	P50168	G1CQF1
P36639	Q3Y5Z3	P25109	Q99P81	Q5G2C6	Q4FDU9
P0DKL9	O62827	P25110	Q99PE8	P07846	D8V3M0
Q8IZ83	A2VE47	P09660	Q9DBM0	P11937	D8V3M2
Q676U5	Q32KR8	P18916	Q99LR1	P43477	E7E2G6
Q8NAA4	A7YY53	Q5U2X5	P51908	Q6XXL8	E0X1Z5
P02763	Q9TT96	O09027	Q9WV35	Q9BG76	B3FI69
P19652	Q28044	O89039	Q99J72	Q95L55	F6KHI8
P20848	P46626	P86173	Q497M3	Q717R8	B5AFX6
P01009	A1L5A6	Q641W9	Q5F2F2	P11547	F8VA58
P04217	P08165	Q4QR76	Q9QZC8	P33709	F6KHG2
Q9NQ94	Q28046	P16638	Q9QXM0	P49885	D8L6Y2
Q5TYW2	P02722	P08482	Q91ZH7	Q9TU15	F1JTH1
Q5SQ80	Q8SQH5	P10980	Q8VD66	Q3T930	F1JTI7
Q5VUR7	P32007	P08483	Q9DBL9	P09199	B2YKY6
Q4UJ75	Q2YDD9	P08485	Q8R2Y0	P16291	Q9GJV6
A0PJZ0	Q05B51	P08911	Q8R0P8	C8BKD0	Q4JG24
Q96IX9	P00257	Q8R5M5	Q6PE15	P29701	A6N998
P08697	A4FV57	Q6TUF2	Q8K4F5	Q7M303	E2DI30
P02750	A6QQV9	Q5FVR5	Q80UX8	P20003	A5YU17
P01023	Q17R10	Q99NB7	Q922Q6	P48808	D0PQJ2
A8K2U0	Q0VCT1	Q63270	Q8VCR7	P68214	D0PQJ6
A7E2S9	Q2KJI7	P07308	Q9Z1Q2	P68116	Q9BEF6
Q5T5F5	Q2TA45	Q6P7B9	Q80YU0	O02761	Q0MW18
Q9NPC4	Q6QME8	Q9ER34	Q8CBW3	P18685	H9TKZ0
Q9UNA3	Q6T5B7	O88267	P62484	P18686	D0PQJ0
P05067	P56413	O55171	Q8BYZ1	P01227	E5FXB8
Q96GX2	Q17QF0	Q8VHK0	P00520	P35379	Q8WF85
P30542	P25104	P07872	Q4JIM5	P31514	S6BSY4
P29274	Q865F8	P97562	Q8K4G5	B3FL73	H6URZ8
P29275	A6QQC0	Q63448	Q8BL65	Q28554	C9DF84
Q6P2N6	Q2PT36	P13676	Q69ZX8	P31234	H6WU55
P33765	Q9BDK2	Q66H78	Q4KML4	O02686	U5Q235
Q9NS82	A5PJM4	Q6AY33	Q8BUZ1	Q866Z6	O03405
P22760	Q0II26	P29293	Q5SSL4	P35547	Q6YN87
Q9NRG9	Q08DH7	Q499N5	Q9QYL7	O18830	Q861T3
Q15758	Q95MP1	P18163	Q99LJ2	O77681	Q540J1
P01011	Q7YRC1	Q63151	Q7TQI7	Q28575	Q207D0
Q86V21	E1BKA3	O35547	Q5SWU9	P01218	J7ILX9
Q8N5Z0	Q3ZCJ2	O88813	Q9D7B6	Q8MJ25	D0PQK3
Q7RTV5	O77797	P33124	Q8JZN5	P35623	K0A5R1
Q6PD74	P24275	O70490	P51174	P32237	D0VEF7
Q2M2I8	A8YXY8	Q6SKG1	P45952	Q28588	A5YRP6
Q9Y478	Q01314	Q7TN78	Q07417	O46678	D2KMM4
O43741	Q5EA92	Q6AYT9	P50544	P47851	A0A2H6
P54619	P48644	P62738	Q8K2H4	P79365	D2KML5
Q9UGJ0	P52476	P60711	Q6ZQK5	P47843	B3VSH6
Q9UGI9	A6QP75	P68035	Q99J27	Q8WMN1	Q6QLU1
Q9H7C9	P30907	P63259	Q5XG73	Q6YNC8	Q4PL72
Q13685	Q1JPA0	P63269	Q9D061	Q9N1R5	Q6UZ50
Q13131	A7YWE4	Q6AY16	Q9D258	Q28555	Q6UZ47
P54646	Q148F2	Q9Z1P2	Q99PU5	P68240	Q157F9
Q9Y312	Q2KJC9	Q9QXQ0	Q2XU92	P68057	C7EXB8
P86434	Q0P5F9	P68136	P31786	P68056	A5JSS8
Q4LEZ3	Q2KJH9	Q5XIK1	Q8K370	P02083	P82017
Q9BTE6	A4IFH5	P85515	Q80XL6	P02076	I3RYY1
Q9UDR5	P02769	P80202	Q9DBL1	P02075	K7TGV0
Q8NHS2	P20000	P70539	Q5EE38	B3VSB7	L7ZEN9
P17174	Q3T0S5	P80203	Q8R0I0	P68038	L0BU95
Q9NY61	P16116	P80201	Q8R4X1	Q28598	K0P739
P00505	Q0P5D9	Q6AYS7	Q8VD53	Q28599	K0P7C2
Q7Z5M8	Q58DM4	Q6PTT0	Q9D099	Q28600	B2YKZ0
Q96GS6	Q32L00	Q9R1T5	P21836	P14157	A7UDR8
Q5VST6	E1BH29	Q5M876	P09470	P49925	A0MPU6
Q6PCB6	Q2M2S8	P35745	Q91X60	Q28601	D0PQY8
Q7Z5R6	A1A4L5	Q10743	Q8R4G9	P14158	C6FX28
P31941	Q28133	Q9QYV0	O70174	P14159	D2SZY0
Q9UH17	Q2KIG4	Q9Z1K9	Q2MKA5	Q8SQG7	V5NVT7
Q9NRW3	Q4LAL6	P97776	Q9R0W9	Q28605	D3YJ02
Q96AK3	Q9XSX7	P43140	P49582	P62757	D0VEF8
Q8IUX4	P00978	P15823	P04756	Q29400	A7LLN6
Q9HC16	P10731	P23944	Q9ERK7	Q28893	B2YKX7
Q6NTF7	P02817	P22909	Q8BMN3	Q95208	E2ICF7
O95477	Q99004	P19328	Q8R493	Q6XUZ5	Q29430
Q9BZC7	Q32L08	P22086	P09690	P17773	G1DFY0
Q99758	E1BEQ5	Q3KR54	P02716	P56828	Q9TV01
P78363	F1MRK3	P70505	P20782	P56829	G1DG91
Q8WWZ7	Q32LQ0	Q63202	P04760	P56832	A8CZ31
Q8N139	P00727	Q5BK84	Q9JIX8	Q29429	C1ICA0
Q8IZY2	P79098	Q63180	O54967	Q28594	B9VV80
O94911	P51122	Q9JK15	Q9QUI6	Q08071	B3VSH0
Q8IUA7	Q3SZC6	Q9EQR2	O08707	Q08072	D2DS56
Q8WWZ4	P13204	Q561R2	P56485	Q08070	B3VSH8
Q4W5N1	P55206	Q920P6	Q924I3	Q08053	B5LSV4
Q86UK0	P07501	Q5BJQ0	A2AKE7	Q28595	C6ESG8
Q86UQ4	P80929	Q6AY19	Q99MR0	P28169	Q56B38
Q2M3G0	P10152	P26769	Q9Z2N8	P10763	D0PQM3
Q9NP58	A6H7I3	P21932	Q9QY84	P10764	B2YKY4
O75027	Q1RMR1	P26770	Q9QY83	Q29408	C4MEB2
Q9NUT2	Q2KJ51	Q04400	P83855	Q9TU27	D2XUT4
Q9NP78	Q5EA66	Q03343	Q91V92	P68220	B6ZCR1
Q9NRK6	O18920	P40146	P12657	Q9XSJ6	D0PQI8
O95342	O77802	Q9Z286	Q9ERZ4	Q28579	D0V3Q4
Q09428	Q24K15	Q63028	Q9ERZ3	P21621	D0ELG4
O60706	P01017	Q05764	P32211	P26898	E0X1Z2
Q96J66	Q3ZBX7	Q62847	Q920H4	P19114	E0XJW7
Q9NSE7	Q0VCS9	P06757	Q8R519	Q06435	Q19AP0
P33897	Q58CQ5	Q64563	Q8BQU3	P30368	Q6QTE7
Q9UBJ2	A7YW45	Q5XI95	Q8BGG9	Q28586	L0BT11
P28288	Q5E9L5	P41682	Q32MW3	P29455	S6BSH0
P45844	A6QQV6	P12711	A2AKK5	Q28540	S6BT80
Q8NE71	A6QLE6	Q8CGZ2	Q8VHQ9	P36925	S6AZL1
P61221	P46197	Q64640	Q9DBK0	Q28589	S6B3U7
Q9NUQ8	P10730	P61312	Q9CQR4	Q95207	D0PQJ8
Q9UG63	A6QR20	P43145	Q9CQJ0	P38440	D4PB76
O14678	Q0VC93	Q9JKL8	P28271	P43032	D0PQK2
Q9UNQ0	Q0P5B9	B2RYJ4	P13516	P01318	F4YFL3
Q9H172	Q3SX00	Q02589	P13011	Q6DN07	Q3HTG2
Q9H222	Q5EA33	Q5M886	Q99KI0	P00997	Q3HTG7
Q9H221	Q1LZC5	P18090	O55137	B0FYY4	Q4JQN3
Q8N2K0	Q2T9W8	P10608	Q9QYR9	Q6ECI6	Q3HTF1
P41238	A6QPE7	P26255	Q9QYR7	Q863C4	E0X1Y8
Q9Y235	Q2KI79	Q9JMB5	Q8BWN8	O77727	E0WX66
Q8WW27	P41361	P56522	Q6Q2Z6	Q9BGM5	F2X355
Q6UXT9	P27214	Q05962	Q32Q92	P02534	D5HMQ1
Q96SE0	P46193	Q09073	P58137	P25690	C5H878
P08910	P04272	Q5M828	Q9R0X4	P02539	C7FDJ1
Q8WU67	Q3SWX7	P24483	Q9R0H0	P15241	G9B4W9
Q8TB40	P13214	A2RUV9	Q9QXD1	P25691	Q7YRW4
Q8WTS1	P81287	Q63191	Q9EPL9	Q9MZD9	O19810
Q9BV23	P79134	B2GUW6	Q9DBS4	P67829	B3VSH5
Q96I13	P20072	P63003	Q8BHA9	P02446	Q3HTF8
Q9NUJ1	Q95L54	D4AB98	Q9CR21	Q6S343	A5YRP5
Q8NFV4	Q3ZC08	Q5M971	Q3V140	P02445	Q3S616
Q7L211	Q9TTK6	O35889	P23578	P02443	Q49JI2
Q9BUJ0	Q29437	P36953	Q99NB1	P02441	Q3HTG0
Q96IU4	O46406	Q8VH46	Q9QXG4	P02444	D2DS49
O95870	P21398	O88788	Q8VCW8	Q02958	G0YW76
Q9H3Z7	P56560	Q8CGU4	Q3URE1	P02448	Q5U7H6
Q8IZP0	P48034	Q4KLH5	Q80WC9	Q28580	S5TC36
Q9NYB9	Q08DS7	Q9QZ81	P41216	P02438	G0YW78
Q9P2A4	Q2KJ81	P25304	Q9CZW4	P02439	Q6S4N9
P00519	Q3SYW1	Q64565	Q9QUJ7	P02440	B2YKZ1
P42684	Q1JQ98	P35351	Q8JZR0	P08131	Q4JNX9
O14639	Q3ZBS3	P25095	Q91WC3	B0LKP1	B3FIN3
Q6H8Q1	Q0VCK5	P29089	Q91VA0	P26372	D2KMJ3
O94929	A1A4R9	Q6DTM3	Q8K0L3	P67975	D2KMK6
Q9P1F3	P63009	Q75NT5	Q3UNX5	P67976	D2ST63
Q8N0Z2	Q3ZC13	P41738	Q80W40	P09462	E7FKN2
Q12979	Q17QC5	P55009	Q8BGA8	P81184	G1EIN9
Q9ULW3	Q32PG1	Q9JM53	Q14DH7	Q28603	Q6R644
Q969K4	Q865S1	Q32PX2	P62737	Q29524	Q68G89
Q8N961	Q24K11	P23565	Q8BFZ3	P46628	Q1HKZ9
Q13085	Q2YDH6	Q9JLG9	P60710	P01231	A5H9I8
O00763	Q1JQA3	Q5FWY5	P68033	Q28585	B3VSH4
Q9UKU7	Q29RJ1	Q4W8E7	P63260	P98109	Q3HTG3
Q9H845	Q29RY8	Q5U2Z2	Q64326	P17607	Q6PLS7
P28330	Q3ZBB6	P51635	P63268	Q9TUN1	B5M8S0
P11310	G3MZC5	Q6AYQ2	Q8CG27	P80190	Q6R639
P16219	Q5E9X5	P31210	Q7TPR4	P41983	D0ETJ4
P49748	Q2YDH1	Q62924	Q9JI91	P79204	E7FKN1
Q15027	Q3ZCF6	Q5QD51	O88990	O46683	Q5FX26
Q15057	Q2NKV2	O35817	P57780	Q9BDJ7	D3Y5Y0
Q96P50	Q3SZ31	Q6JP77	P68134	P80931	D0PQY6
O00400	Q58DR0	O88884	Q9D9J3	Q09YI9	D0PQK0
Q8NC06	Q9TUI9	Q5U301	Q9D9L5	Q1ZZU7	D0PQK1
Q5T8D3	P23196	O35774	Q8BXF8	Q6J8I9	D4PEB4
Q9BR61	Q5E9N9	P24587	Q8R5C5	O18845	D4P8H7
Q8N6N7	A0JNH9	Q9WVC7	P61164	O19037	G8HYS2
Q96GR2	Q3T0E5	Q63014	Q61271	P67982	B5LVN9
Q5FVE4	P15497	P51652	Q8K348	P09577	H6VMG9
P07108	P81644	Q5U1Y4	Q61288	P09578	A2SY11
Q6JQN1	Q32PJ2	Q25C79	P37172	P68302	Q49JI3
Q709F0	P19034	P47196	Q99JW2	Q8MKE4	Q49JH4
P45954	P19035	P47197	Q8R3P0	P48040	Q49JH7
Q96AP0	Q3SYR5	Q63484	Q91XE4	Q28558	O46648
Q9BYF1	Q32KY0	Q5FVH4	P56376	P33237	Q68G91
Q8TDN7	Q03247	Q5FVK8	P56375	Q5I2P5	K7T9C4
Q5QJU3	P17690	P51647	Q9R158	Q28566	Q49JI5
Q9NUN7	Q3SZ27	Q63639	O35598	C8BKC7	S6AZU2
P22303	Q148H0	Q8K4D8	Q9R1V4	P02190	E1U8C6
P12821	Q148E1	P13601	Q61824	O02827	C8CTE3
Q9GZZ6	F7VJQ2	Q66HF8	O88839	P29331	S4SAA0
Q15822	Q7YRZ2	P28037	Q9Z0F8	P13389	E7FKN4
P32297	Q56JW4	Q6AY08	Q9R157	P01181	G9B4X0
P43681	P47865	P11883	O35674	Q29498	S6B445
P30532	P79099	P30839	P97718	P79209	S6BTY3
Q15825	Q08DE6	Q5XI42	P97717	O97704	D0VEG0
P36544	O77750	P0C2X9	P97714	B2KKR4	F2VRR5
Q9UGM1	Q32PC9	P20291	Q9JI76	Q28602	D2KMM9
P02708	Q3MHM8	Q64057	Q9R1V6	P79211	Q4U480
P17787	P21146	Q9JLJ3	Q9R1V7	P14765	Q9BG81
Q05901	P26818	P25409	Q9R160	B3SV56	Q8SPV6
P30926	Q1JP79	P02770	Q9R159	P49280	F5BD78
P11230	Q58CQ2	Q5RJP0	Q9JLN6	O78747	A7KT20
Q07001	Q2YDE7	P11884	Q811Q4	O78748	S6ARX3
Q04844	P84080	P05065	Q01338	O78753	S6AZR2
P07510	P84081	P00884	P30545	O78754	D0VEG4
Q9UKV3	Q5E9I6	P09117	Q01337	O78755	A0SWQ2
Q07912	Q3SZF2	P07943	Q8K410	O78756	D0VEF9
Q16570	A1L520	Q9Z213	Q923W9	O78757	S6AZG1
O00590	Q17R07	Q5I0K7	Q5SUE7	Q2V8X7	A0SWQ0
P25106	Q3ZCL5	Q6AY85	Q9D5P4	P02700	D0VEF4
Q9NPB9	Q32LJ2	Q3T1L5	Q80SY6	Q9XSY9	D2KMJ8
Q5JWF8	Q0P5E3	Q5XIC8	Q60718	P84010	D0VEG1
O96019	Q29RM4	D3ZKD3	Q3TTE0	Q28542	D0VEG5
O94805	Q2KJ64	A0JPQ8	O35227	Q28756	E0XJX1
Q9Y615	Q58DL1	Q6AYP0	Q05910	P51664	D0VEF5
Q9Y614	Q2TA42	Q63042	Q61072	P14419	S6ASB2
P53396	Q58DL7	P0C5Y8	Q8R2V5	P83500	Q153G7
P11229	Q3SYV9	P35859	Q8C0I1	P83499	R9W073
P08172	Q3ZBM1	Q63087	Q9JHI2	P83494	D0VEG3
P20309	A2VEA3	P70473	Q6P6J0	P83497	D2KMK0
P08173	Q3SWY1	Q62840	Q6PAT0	P16613	Q9TTW6
P08912	E1BLP6	Q64240	P03958	O02849	Q2KKJ5
Q8TDX5	Q58DI9	P14925	Q9D0L4	Q28755	Q9TTW5
Q9NRP4	Q5EA19	P63278	Q6NSR3	P83202	Q6R637
Q8WXI4	Q2YDM1	Q80ZD7	Q60936	P83203	Q0Q6H4
Q8WYK0	Q2TA37	Q7TNJ4	Q566J8	P83495	A1XX04
Q9NPJ3	Q2TBW6	Q80ZD5	Q80V03	P83444	Q0QB99
Q8N1Q8	Q3T0M9	Q62893	A2A7Z8	P83493	Q9TTX5
P21399	Q0VC18	Q5U201	Q8BM81	P01301	Q9MZB4
O00767	Q2KJ96	G3V735	O88444	Q95229	Q53ZM5
Q99798	Q0IIM2	O09175	Q80TL1	P82197	A5A2J6
Q86TX2	Q2KI07	P10759	Q8VHH7	Q28550	B4XH78
P49753	Q3SZJ0	Q02356	Q91WF3	Q28905	C0L641
Q8N9L9	Q3ZBE1	O09178	P84309	P05979	A8QK80
Q3I5F7	P0C6R2	P50123	Q01341	P79208	C6JVY0
O14734	Q2KI54	O08838	P51829	O46390	C6ZP49
Q9Y305	Q2KI89	Q68FS4	P97490	Q9TTE2	D0PQL6
Q15067	Q9BE97	P15684	P51830	P79364	D0PQL8
Q99424	A6H7J2	P69527	Q8C0T9	P83204	C1K0I2
O15254	Q3ZBD2	Q99068	Q8BVM4	Q95JH0	C0L637
Q9NUZ1	Q28055	Q3HS82	Q9QYC0	P30035	B2CZE9
P13798	Q7M2N1	P00689	Q9QYB8	B0FJL7	E0AEV8
Q8TE99	A7MB62	Q400C9	Q9QYB5	P81286	F1CGU8
O14561	P61157	Q400C7	Q9R0X2	Q28597	F2X2Y9
Q8NEB7	Q5E963	P49911	G3UZ78	Q28590	G0TBE5
Q96QF7	Q1LZF2	Q9EST6	P00329	Q7JK02	U5HTF1
P10323	Q3MHR7	Q5XIE0	Q9QYY9	P23907	F1DAU3
Q08AH3	Q3T035	Q5BJT1	Q64437	O46561	F1CGU5
Q68CK6	Q148J6	P15207	P28474	P01240	J7HHR2
Q9NUB1	Q3SYX9	P13205	Q8R400	Q9GJY2	G1DG02
Q9NR19	Q17QU3	P55207	Q60994	Q8WN12	E5KXS0
Q96CM8	P17870	P01161	Q8VC66	Q9XSM0	C6JVX6
Q4G176	P32120	B2RYM0	P55264	Q9GK30	G9G9W5
Q4L235	Q9N0H5	Q6TMA8	Q60813	Q5MIB6	G1DFR0
P33121	Q0VCA2	O35460	Q8R534	Q5MIB5	G9I2A5
O60488	Q32KX1	O35462	Q7TNK8	O18751	G1DGH3
Q9ULC5	P08168	P01015	P97297	Q6XXM7	B9VJ26
O95573	Q08DD1	P58366	Q8CHC8	P52115	I0CCB7
Q9UKU0	Q148F3	Q7TP65	Q9Z103	P12663	M9PPI4
Q08AH1	Q3SZW3	Q8R560	Q8VDL4	A8D8X1	J7HID5
Q53FZ2	Q1JPA6	Q5M9H0	Q9CQF6	P0C276	K9K4W2
P0C7M7	Q17QB3	P0C0T2	P54923	P67927	H9TL00
Q6NUN0	O97902	Q66H85	Q99KS6	Q29543	K7RCQ1
Q9H6R3	Q3SZE4	Q63009	Q91VH1	Q70IB1	V9I0N0
Q6P461	Q8HXA6	O70467	Q8BQS5	Q6Q311	S6ARW4
P62736	Q32KY8	Q5U4E8	P34971	Q6Q312	W0T0L9
Q562R1	Q3SX45	Q6IFT6	P18762	A6YRY8	W8R5V3
Q9BYX7	Q08DV6	P18910	P25962	Q9MZD1	W6CGL7
P60709	Q17QS6	P16067	Q9JKV1	B2MVX9	W8NX99
P68032	Q08E43	P41740	Q61578	Q9GJY3	D2KMM3
P63261	E1BNG3	Q499M5	Q60604	P42819	B2BY42
Q01718	Q2EGB9	Q76K24	P48962	P49928	G1DFU6
P63267	Q8HXK9	Q566C8	P51881	P49929	F8UM52
Q9H568	Q2KIG1	Q641X1	Q3V132	P53791	A7Y3X8
Q8TC94	Q17QJ0	Q62781	Q8C138	P79368	W8G3C9
P12814	Q32LE5	P0C6S7	Q9CPW2	O62816	Q6TRF7
P35609	A2VDP0	Q0PMD2	P46656	P31299	C6JVX5
Q08043	Q29414	P07150	Q640N1	O19097	V5TAV8
O43707	Q3ZC91	Q07936	Q9Z248	Q9TT06	G1DFU3
P68133	P10950	P14669	Q6PDY2	B2LU20	Q9TTX3
Q8TDG2	Q0VD19	P55260	A2AJA7	Q6QD73	Q0QB98
Q9BYD9	A5PJI5	P14668	Q9CZI9	P07217	S6B559
Q8TDY3	Q0V8E4	P48037	P63002	Q6V9X0	A5JSR9
P42025	Q1LZA3	Q4FZU6	O54826	O46688	B8ZIZ4
P61163	A1L515	P36633	Q8BZI0	Q29495	B5KLP1
P36896	Q28056	O08590	Q5DTU0	P09670	I0BWM0
Q8NER5	P62285	P21396	P97783	P67930	G1DG06
P37023	Q3ZBN5	P19643	A2AM29	P54231	F2X2Y7
Q04771	P14568	Q9Z0U5	Q9QZQ1	Q70TH4	D3JW66
Q03154	Q2M2T6	Q5QE78	O89020	A6XN32	W8FZK0
P45381	Q8WMX8	Q5QE80	Q80YS6	Q03257	Q9TTW8
Q96HD9	Q08DA1	Q5QE79	O88573	Q09YI5	C0L640
P07311	A2VDL6	Q05140	O55112	P42231	Q079S9
P14621	Q28030	P52303	P51827	P79245	Q9BDX3
O14672	Q3T0C6	Q32Q06	Q9ESC8	P22613	I1WZP5
O75078	A7MB71	P18484	Q920A7	O97965	V9XY47
O43184	Q0VCY0	P58197	Q8JZQ2	P61268	G9I2A8
Q13444	P57709	P62944	Q80WT5	Q09YJ2	D0VU01
P78536	Q5E9S4	P84092	Q3UGP8	P98135	M9TKR5
Q9Y3Q7	P32876	P62744	P51569	P50414	Q4PRC1
Q9H013	A6QNS9	P53676	Q3UHD9	Q28570	G1DGB1
P35348	Q3T136	P53678	Q8BXK8	P50450	G3LGR6
P35368	P07926	G3V8Y7	Q8VHH5	Q28571	G1DGF4
P25100	P13619	Q6PEC0	Q80WC7	P50413	I0CCB4
O43506	Q3ZC75	Q2PWT8	Q8K2K6	P50122	Q2XV14
Q9UKJ8	Q29449	D3ZVB0	Q7TN31	Q29428	I3VKU8
Q9P0K1	F6QV99	Q499N2	Q9ESW4	B2LT65	J7HHS8
O75077	A7YWC4	Q9EPV5	Q9CYR6	Q5I2M4	E1A9L4
Q9UKQ2	Q58CX6	O35430	Q8CJG1	P23383	D2XNQ3
Q9UKF5	Q08DA8	O35431	Q8CJG0	P50751	G1DFS3
P08913	Q2KII1	O70248	Q8CJF9	E5FYH0	B5KLP9
P18089	Q3ZCH6	P46933	Q8CJF8	Q28596	J7HIC0
P18825	Q3T0W7	O35827	Q8R3W7	P22793	V5KXR6
Q9UKF2	Q08DY8	A5HK05	O88312	P62969	Q9TTX0
Q8TC27	Q0VCL3	D3ZQX4	A2ASQ1	Q9XSM2	U3MI32
Q9BZ11	Q6PZ05	A1L1K3	P56473	P56495	M1H1A2
Q96M93	Q6PZ03	P70478	Q3UEG6	B3VSC2	I3Y0W2
Q8NCV1	Q3MQ24	Q9R0R3	P35374	Q9GMC9	F5AVE3
Q6DHV7	Q3T904	P43138	P29754	P12303	K9LRB6
Q99965	Q2HJE0	Q9JHG3	P29755	Q6S9E0	G4V2B9
Q6NVV9	P01096	Q6B959	Q6PAL7	P0CG55	U5Q2K5
Q9H2U9	Q58D72	P15943	Q8K3E5	C5MK33	Q0QBA0
P78325	Q04645	Q7TP48	Q3U1U7	P21814	Q5I7L6
Q13443	Q3T0E0	P04639	P30561	P48043	H9B8T7
O75689	P05632	P04638	Q8R4S6	O18882	B5AFG8
Q9NPF8	P13620	Q7TMA5	Q8R4S5	P50412	Q06AP1
A8MUL3	Q00361	P02651	Q8N9S3	Q9MZA9	B6F238
O00116	P22027	Q9QUH3	Q9CY02	P63291	C0L635
Q9BUB4	P02721	P19939	Q8BK64	Q9GL59	D6QSY3
Q7Z6V5	Q28852	P06759	Q9WVE0	Q09YI4	A5JSR7
Q96EY9	P00847	P55797	Q8C4Q6	C5IJB0	J7HBN7
P00813	P03929	P23593	Q9EQX4	P08105	Q9TTX2
Q86TW2	A1A4J6	P02650	O70200	C6ZP47	G1DFZ0
Q7Z695	P19483	Q5M889	Q9Z0X1	E0A2G9	G1DGH1
Q8NI60	P00829	P26644	Q8BUE4	D2YVR7	D3K2V6
Q96D53	P05630	P14630	Q3TY86	D2YVS7	V5KXW5
Q3MIX3	Q1LZ96	Q32Q90	Q9D8B1	E0A2G8	D3JXK2
Q6P093	P05631	Q5U777	Q91VJ1	E0A2H1	G1DG53
Q5VUY0	Q28851	Q8K4H4	P31230	E0A2H7	F1APT5
Q5VUY2	P13621	P36972	Q8R010	E0A2H4	G1DFQ7
Q08828	P79331	Q8CHM1	P46660	E0A2G7	Q5EFQ9
Q08462	Q9TT93	P29975	Q924K1	E0A2H5	A1YZ35
O60266	Q9TT92	P34080	O08915	E0A2H8	G9I2A6
Q8NFM4	Q58CZ9	P47862	Q9Z0E3	E0A2H6	G9G8F0
O95622	Q2TBW0	P47863	A2ALI5	E0A2H3	G1DGA0
O43306	Q32KM8	P47864	Q91XC0	F0UY41	I2BF55
P40145	A4IFU8	Q9WTY0	A2A3V1	E0A2H2	Q9TTX1
P51828	Q2TA06	P56403	Q9JII6	E0A2H0	J7HID0
O60503	Q7YRC6	P56405	Q8VC28	G0Z7M8	U5KFI8
Q96PN6	Q27974	P56627	Q91WR5	Q5EZ70	W8CJM0
Q96A70	Q3SZR0	Q6AXT3	Q8VCX1	C6KDW5	G1DGC6
P35611	Q28043	Q4V8C5	O88845	Q5MD03	V9HXF3
P35612	Q95126	Q4V8I5	Q9WTQ5	Q9N1R9	F1CGU2
Q9UEY8	Q3SYW5	Q68FV2	O55074	Q4PNI7	C0L636
O15204	Q1RMX3	P14056	Q7TN79	Q3KV47	B5LYP4
Q8N7X0	Q5E9L4	P26817	O08715	A5HJR7	M1F4T5
P07327	Q0II48	P26819	O54931	B0EXR3	K9LRP8
P00325	Q3C2I0	Q99PD4	O88987	B0EXR4	V9I0K9
P00326	P01888	O88656	Q60662	Q5MA70	W8P9F7
P08319	Q5EA01	Q63053	D3YVF0	B0EXQ8	G1DGE4
P28332	Q17QZ8	P24338	Q9DBR0	Q5MA73	Q8MIM9
P40394	P08037	P84079	Q70FJ1	Q074K3	U3GT86
P11766	Q5EA87	P84082	Q8K023	Q5MA75	G1DGG3
Q0VDE8	Q56JY9	P61206	Q9DCT1	Q5MA76	V5KS88
Q15848	Q08E57	P61751	Q14DN9	G1APH4	Q9TTX4
Q9Y2D8	Q2T9W0	P84083	Q6ZPS6	A6YT89	G9I2B0
Q15847	Q2HJ40	P62332	Q9JJR5	Q6E807	U5HTH5
P55263	Q32PE7	Q62848	Q9DCJ7	Q3KUW7	A1XX03
Q7Z4H4	P61283	Q3MID3	Q99LF1	H9A6I2	B0FYL0
C9JUS6	Q3ZBG5	Q4KLN7	B1AXD8	U5N656	A5JVM3
P35318	Q2TA08	Q9JHU5	Q80VW7	A7L827	J7F900
Q6IQ32	Q5EAD0	Q6AY65	Q9R0L7	Q3KUW9	B5AFX7
Q9H2P0	Q0VCW3	Q63055	P31750	Q3KV44	J7HBL2
Q9BRR6	Q32LD1	P0C6P5	Q60823	W5NWI0	G1DFQ3
Q9NRN7	A2VDM8	P07824	Q9WUA6	M1TCR6	G1DFW6
P54922	Q32KL9	O08701	Q64362	Q9BDI4	G1JSG2
Q3LIE5	Q865R3	Q5BJT0	Q9D1F4	W5QEJ5	W0NTQ8
Q96A54	P80724	A1IGU3	Q8BIX3	U5N311	G1DGD7
Q86V24	E1BD44	Q9Z1I6	P24549	U5N5S3	Q5VK60
P08588	O02703	Q5FVC2	Q62148	E7BQS1	C0L638
P07550	Q1JQ97	Q5XXR3	Q9JHW9	H9NEJ3	F1CGU6
P13945	Q9MZ08	O55043	O35945	A4KAX1	M1HER5
Q16186	Q58DL5	Q9QX73	Q9CZS1	H2AKX1	F8SXW4
P22570	Q5EA40	Q9ES67	Q8R0Y6	A4KB41	W8EHD4
Q9Y6U3	Q2NL37	Q6P720	Q8K009	A4KBF0	G1DGH2
P12235	Q2KJG8	Q5XIB3	Q60I26	W5NY42	T1RLJ2
P05141	O02718	Q9JKB5	Q8BVM7	W5PEK8	J7HBL7
P12236	Q3T0A6	Q8CG45	P47739	W5PMC5	G1DFQ5
Q9H0C2	Q5E9H5	P38918	P47740	W5NQK7	E1B1L1
Q96IZ2	Q3T046	Q5BK71	Q80VQ0	W5QA91	B6CQV3
Q6P4F2	Q02337	P61212	Q8CHT0	A4KB92	G1DFS9
P10109	Q95106	O08697	P30355	W5PQE8	Q76BW6
Q8IUX7	Q4A1L4	P37996	Q9DBF1	A4KBB0	Q865R5
Q6ZN18	Q3MHP8	P61214	Q8BH00	W5QGN0	F1APU3
Q96SZ5	Q2TBV0	P51646	Q9JLJ2	W5Q585	N0GW18
Q6UXC1	Q3ZBJ6	Q66HA6	Q8QZR5	A4KAY5	A5JST2
Q8WTP8	Q3ZBJ9	P20673	Q8BGT5	E0A2C7	E9M472
Q08117	Q06002	B1WBW4	P07724	M1G000	I1W1N1
P55197	Q28177	Q5PQP9	P21300	U3M213	D4PBR8
P55198	Q58D55	A1A5P5	P45377	A4KB04	W6CG84
Q8TED9	P55906	Q5XID7	P47738	A4KBB9	W5ZRD0
Q8N4X5	Q5EA15	Q5U310	P05064	G0Z7M2	M4NJQ5
Q13015	Q5I597	Q66HF0	Q91Y97	Q3KV41	Q6TRF6
P42568	Q0V882	Q78E60	P05063	Q3KV46	W5VP28
P55196	E1BFE9	P41739	P45376	U5I076	G3LUU9
P43652	O46382	Q712U5	Q6R0H6	U5I0N4	G9I2A9
Q8N556	Q58D91	Q5M7U6	Q3TZM9	U5I0P0	G9I2A7
P51825	Q6J1J1	Q4V7C7	Q8VDB2	W5NU74	U5HTG5
P51816	Q2NKW0	A1L108	Q9D8C3	W5PC47	F6KVT2
P51826	A5PJP1	P85970	Q9D081	W5PT38	H9TKZ1
Q9UHB7	Q08DU8	Q4KLF8	Q921Q3	R9ZV26	C1K0I3
Q9Y4W6	P62954	P29066	Q9DBE8	W5PWS5	G8FNH9
Q5BKT4	P52556	P29067	Q8K2A8	W5Q4G8	D3JXK1
Q6ULP2	Q32KX7	P36576	Q9DB25	W5QFN5	C6ZP52
Q5I7T1	Q6PX77	Q6TXF1	Q3TAE8	W5Q844	I0BWL9
C9J202	Q08DX6	Q7TP90	Q6P8H8	W5QBE3	U5QB98
Q5T2P9	P22444	P36577	Q8VDI9	U3M4Z4	M1H5G7
Q8TF27	Q2KJH1	P37200	P0CB42	W5PFH1	B5AFY2
P06280	Q29S19	P15887	Q6P6J4	W5PA59	G8H2H2
Q99490	Q3T013	P50430	Q8K1E6	W0FC05	H9TU32
Q96P47	Q32KN2	Q32KJ9	Q9D8F1	V9QFH0	I1W1N3
Q96P64	Q3T138	Q32KJ8	Q3TSG4	V9QF58	W8EDQ4
Q5SRD3	Q3SZ84	Q32KJ2	Q8K2U2	R9ZVY9	J7HEX6
Q5VTM2	Q08DN6	Q6AYE8	Q9D6Z0	W0FC18	V5KX89
Q9UPQ3	Q17QW1	A6YP92	Q80Y20	W0FF85	W6AWL7
Q5VUJ5	P84291	P50297	Q8BS35	C5IS94	Q867B3
Q5VW22	Q8SPU5	P50298	P97793	F6KXF4	C6ZP48
A6NIR3	Q8SPF8	Q8VHT6	Q9JHX6	W5NX15	Q9XSL1
P52594	P17453	Q6P7S1	Q8K4E0	Q7JFW9	C8C4K7
O95081	Q3ZCK3	Q91XT9	O35936	W5PNX7	H9B8T9
Q8N302	P00974	Q1AAU6	Q9CXB8	W5PVA8	S6AMU5
Q9H0P7	P04815	P0C927	Q91ZB0	W5QGB5	W5U312
Q53H12	Q864U1	Q5U2S6	Q924C5	W5QIQ4	W6GX43
O95394	A5PJP6	F1LPQ2	Q9JJW6	F6KXE1	L0L9G0
Q9UL18	Q32S26	P19359	P56213	C5IJ83	A8QJF1
Q9UKV8	A2VDP1	P19360	Q920R0	C5IWU4	B4XR18
Q9H9G7	A6QQW8	Q8VI04	P70389	Q6QLY7	Q9TTW7
Q9HCK5	Q29S07	P02706	Q8C8B0	A9LHI9	D0VU00
O95994	Q32L83	P08290	O70137	D6R6U0	C0L642
Q8TD06	A4FV29	Q5RJT0	O35137	C6KDX6	M1LMQ9
O00468	Q1LZE0	P55926	O09174	Q09PL1	A1YZ03
O00253	Q5E9L2	Q62962	O55189	A9LHJ4	A5A2J7
Q9BXM8	Q3SZZ0	O35240	Q07456	C9W8Y4	M1H6M8
Q9BYV1	Q5E9P6	Q9JHS6	P97467	C9W8U4	E9NS14
P30556	Q3SX22	Q9R0W5	P63277	E0A9E3	F1CGU1
P50052	P18892	Q99JA2	Q7TS75	C9W8Y6	Q4ZIQ1
Q5TGY3	Q2KIY7	Q641Z7	Q8CCJ4	V9QEG6	G9JKW9
Q8N157	A4IFG2	B3GSH5	Q6NS69	W0FBW8	Q712N0
Q8IVF2	Q32L18	P49088	Q8JZZ6	C9W8U2	A5JSS5
Q09666	A6QPA3	Q5I0J9	Q9R049	C9W8U3	Q0PG40
A9YTQ3	Q9TTC5	P30919	Q80ZD8	W5PQK7	Q7YS14
P35869	A6QQ07	Q5HZW3	Q80ZD9	D2XR08	G1DFT4
O95433	P53348	P09034	Q8C2S7	B3F205	Q6YN91
Q719I0	Q1JQB2	P54708	Q8K592	C9W8S4	F1CGU3
Q9NZD4	Q2NKU3	P06685	Q9JHT5	H9A6I5	A6N3I5
Q9GZX7	Q5E9N0	P06686	Q99JB7	U5KP80	Q9T574
Q96BJ3	A0JNH6	P06687	Q8K371	C6KDX2	J7HBP3
Q9BQI0	Q32KM2	Q64541	Q9D4H4	C6KDV4	U5Q265
P55008	P15150	P07340	Q8VHG2	M1G1Q3	A3F4M4
O95831	P85521	P13638	Q8VCT3	U3M239	W5VVI0
Q9BRQ8	Q32PE4	Q63377	Q3V1D3	B5DC89	W8QFZ0
Q96NN9	Q3SX46	Q9R193	Q9DBT5	D9IR31	Q3T2K9
Q9NVV5	Q0VC84	Q64578	O08739	Q38R85	Q9TTD9
Q8N1P7	Q5E9E3	P11507	P16406	D6PX64	U6A087
Q9Y4K1	Q3T0B6	P18596	Q7TQF7	T2K1S4	H9TU40
O14862	Q2KIV9	P11505	Q9CPY7	W5P347	W8E7I1
Q12904	Q0II24	P11506	P97449	W5NQI8	W8EF99
Q13155	Q0VCX1	Q64568	Q8BXQ6	D4P8H6	Q76BW7
Q16352	Q0VCR7	Q64542	Q2KHK3	W5PS90	A3RI38
Q9NZN9	Q24JY8	Q64566	A2AH22	W5P6I4	A5HEW3
O00170	Q2KJ18	Q8R4C1	P55302	W5NXU8	D6PW90
O43918	Q5BIS3	Q06646	Q9D3J8	W5P8N0	Q14VH4
Q9UKB5	A6QLJ4	Q5I0I4	P00687	Q95MZ7	G1C858
Q96IF1	Q9GKI7	Q71S46	P00688	E7E2G8	G9I2B1
Q02040	Q28065	P19511	Q8BVF9	W8CXR0	H9TKZ6
P14550	Q28066	Q06645	Q400C8	E0A2B7	H9TU38
O60218	P35720	Q505J9	Q80UP5	C6KDX9	D7RH36
C9JRZ8	Q5E965	Q3KRE0	Q5F259	A5YBU9	Q9XSP0
Q04828	A1A4K1	Q6MG11	Q3UX43	B5DC92	F1CGU7
P52895	Q5E943	Q1M168	Q6PD24	B7U175	G1DFN1
P42330	Q32LF5	Q00969	O35381	C9E8M7	Q6YN94
P17516	Q148C7	P29596	Q9EST5	Q5MCZ1	O79320
P51857	A6QQA5	Q9ES19	Q64G17	W5Q1T6	A3RI42
O43572	Q32L72	Q6P788	P97822	W5QJB9	V9H1B4
Q9UKA4	Q1RMX6	G3V909	Q3U0L2	W5Q343	F5B6L8
Q02952	Q2YDE2	Q2TBJ5	Q3UUF8	D0FH77	C6ZP43
Q86UN6	Q32P66	Q6AZ50	Q8BLB8	Q9TTD4	G8FSB6
O43687	Q2KIL1	Q3MQ06	Q8BZQ7	A6YT87	I6ZHM3
Q9P0M2	Q2TA05	Q641Y5	P19091	Q8HZ56	V9I0N8
Q92667	Q2TA11	Q5FWU3	P40753	C6KDW0	I6VHE2
Q9Y2D5	Q32PF7	Q6AY69	Q61839	H9NEH8	D4PB77
O75969	Q2M2T8	Q03344	Q810B6	W5NUV4	G1DG99
Q5JQC9	Q32L75	Q4FZU4	P05125	H9NEI4	U3GWG6
P24588	Q3SZT6	Q6PST4	Q64438	Q38R70	T1RTP2
Q13023	Q58CU6	Q0ZHH6	P97802	R9ZY17	G1DG05
O43823	A4IFJ0	P54258	Q3TMQ6	H6VP75	A3RI39
Q99996	A7MBF6	Q04679	Q8VCU0	H9NEK2	S6AMV3
Q5T2L2	Q2T9W9	Q9WUC4	Q8K1C0	C6KDW2	W5U964
Q96JD6	Q29RI6	P09626	P21570	C5ISA4	V9V930
Q495B1	Q3ZBZ1	P18598	Q640P2	C1K0L7	W8EFA6
A6NHY2	Q9N1R0	P29418	Q9R045	W5NXV5	G8FNH8
Q9P2G1	Q9N1Q9	P31399	Q9R182	O19186	G5DC61
Q9NQ31	Q8HZJ4	P21571	Q9Z1P8	W5P456	G0ZCG5
Q9H9L7	Q9N1Q8	P29419	Q8R0Z6	W5QJB0	G1DG36
Q9NWT8	Q2TBJ9	Q6PDU7	Q8R1Q3	B0EXU4	G1DGG4
Q53H80	P05805	Q5XIM4	O08538	U5N659	O79319
Q7Z591	Q9MZL7	P05504	O35608	B5DC93	G0ZEM1
Q5T1N1	Q9MZL5	P70705	Q9WVH6	C6KDV8	M1F3Z6
Q12802	Q9MZL3	Q64535	P11859	I2BJM7	W6CJ39
Q9ULX6	Q2KJ21	P11608	Q02357	W5Q2G6	W8EMU3
P31749	O18737	D4ABB8	Q8C8R3	Q28583	Q3LRQ1
P31751	Q3B7N0	P15999	G5E8K5	F6KXD8	B5AFX4
Q9Y243	Q08DJ5	P10719	A2RT91	F6KXF3	F1APT6
Q9H8T0	Q6R8F2	P35434	Q9D2J7	F6KXG2	C0L7N2
Q96B36	P19534	P35435	Q9JHZ2	F6KXF9	G3ETQ7
Q8N8R7	P19535	D3ZAF6	Q8BZ25	F6KXG3	D0PQL7
P00352	Q6URK6	Q06647	Q6P1H6	Q19BJ5	D9I5T4
O94788	Q3SWX5	Q642A2	Q9CR42	C9EI12	D6PVB9
P47895	A6QLA6	Q99J86	Q9WV06	W5P3J0	V9VIE2
P30837	A0JN41	P70486	Q9D504	W5PUQ6	Q6QVC4
O75891	Q866X7	Q9WUQ1	Q69ZU8	W5QAH2	G1DG12
Q3SY69	Q1LZA1	Q9ESP7	Q8BH83	W5Q8W8	D2KMM0
Q60I27	P00921	Q1EHB3	Q9CZK6	G1FEX2	E2GIP6
Q53TS8	Q3SZX4	P04694	Q6GQX6	R9ZVY5	G1DFS0
Q96Q35	Q95323	Q9ER24	Q3UUE9	U3N063	F1CGU4
P30838	P18915	Q63540	Q3TPE9	W5QBP6	W0NXE8
P51648	Q2HJ63	O35815	Q80UU1	W5NTE7	Q9TTW9
P43353	P04467	D4A540	Q8K298	C5IJ99	B5AFX9
P48448	Q3ZBY3	D3ZUC4	Q9JIF0	G9BZG7	O03406
P30038	P01260	A1L134	Q9R144	W0FC14	F1APU2
P20292	Q27976	P59241	Q922H1	W5P1I3	G8XPL6
P49419	Q28068	O55099	Q8CIG8	W5PXG3	W8FVU0
Q9H2A2	Q3T0E8	Q9WU06	Q6NZB1	C5ISB1	U5HTF3
P49189	P62157	Q8VDA6	Q922X9	U3M2Q8	G4W932
P24298	Q2TBR8	P38444	Q6PAK3	W0FGL1	A1XX02
Q8TD30	A6QP74	P38445	Q3U3W5	W0FG74	A6N3I4
P02768	P52193	O70239	Q8C0W1	W0FG61	G1DFN9
P05091	Q3T0K1	O70240	Q8BH79	W1I763	G1DFP3
P04075	Q27970	Q4KMA0	Q8BHY3	K7XAX2	G5DC62
P05062	Q27971	Q63764	Q8CFW1	W5PG95	I1VE56
P09972	P51186	P53563	A2AHL1	W5QB52	R4WBN5
P15121	P63099	Q99M66	Q8C5H1	H6SGV5	Q9TTQ6
P84996	Q2TBI5	O88498	Q75UR0	W5PEN0	F2XXG1
Q2TAA5	A7MBJ5	Q6AYK4	Q6P9J9	C5IWU1	Q6R647
Q9BV10	Q3SYV4	P07151	Q6PB70	W5PQ22	Q4FDV3
Q9NP73	Q865V6	P23347	Q14AT5	W1IAM8	G1DG79
Q6GMV1	Q1LZB6	P23348	P86044	W5Q7R3	Q2HXS0
Q96F25	P79136	Q8K4V2	P18293	D6R7I9	B8YMT5
Q9BT22	Q58CW6	P23562	Q6VVW5	W5P8Q6	R4N479
Q9H553	Q68RJ9	O35789	P70180	W5Q9T9	U3MKB3
Q92685	P02662	Q9Z137	Q99LW0	Q4TUB8	C1K9J6
Q9Y673	P02663	Q6AY39	A2AS55	C8BKE3	W0KS13
Q9Y672	P02666	Q99NB2	Q99NH0	W5PAR5	W8ELD9
Q9BVK2	Q29RU8	Q66H69	Q812A3	W5NVT6	Q0GIJ1
Q9H6U8	A5D7H5	Q6GV29	Q9D3J5	H9NAU0	F1APU1
Q13686	A2VE10	O88178	Q80VM7	W5QFB5	W8R7F7
Q6NS38	P02668	Q10468	Q811D2	W5QCJ6	Q7YRW5
Q96Q83	Q08DY9	P80225	Q3UMR0	W5QFT3	P79428
Q9NXW9	Q5E9C1	Q6P768	Q505D1	Q866S4	C0L639
Q6P6C2	Q3T0P5	Q66HH1	Q8R3P9	W5P472	Q28322
Q3KRA9	O75601	O88419	Q8BXP5	E5LCS0	Q5MBE8
Q9BT30	P35384	P0C5J2	Q569N2	W5P2W9	Q8HZJ7
Q96BT7	P00432	P0C5J3	Q9D2X0	W5PD15	I0CCB6
Q6ZNB7	P07688	Q920K5	Q5SUE8	W5QJA7	J7HBM0
Q9UM73	Q3ZCJ8	Q63276	Q3V096	B0EXQ6	Q6S564
Q8N6M5	P80209	Q5XIJ6	B2RXR6	Q5MA69	Q7YRU8
Q96L16	Q3T0I2	Q7TNY1	Q810N6	H1ZZ70	O19203
Q8TCU4	Q5E968	Q7TPL3	Q8BTZ5	A5HJR6	Q283L5
Q96QP1	P25975	P56819	Q8VE42	W0NTA9	Q8MJC2
Q86TB3	Q5E998	Q6IE75	Q8BTI7	Q1ZZV5	Q5D4Q0
Q96L96	P25326	Q64559	Q3V0J4	B0EXQ9	Q95KL0
P55789	P05689	O35147	Q91WK7	E0A255	O19216
Q96Q42	P79132	Q9R1T1	Q8BLD6	Q5MA65	Q28328
P35858	Q66WT7	B0K019	Q9CQM6	Q5MA68	Q8HY37
O95076	Q2KI43	Q5QJC9	A2ARS0	Q1ZZV4	Q8MKD7
Q15699	Q0VCC0	Q6MG49	Q99PE2	B1PM77	Q8SPV5
Q9H161	A4FUA8	Q6GMN2	P61110	C7T4X9	Q95L51
Q9UHK6	Q5E997	D4A4K3	P59672	Q29431	I7HIT0
Q9NP70	Q3SYX3	Q91XN4	Q8BIZ1	Q29439	Q7YRW3
P02760	A3KN05	D3ZHS6	Q8K3X6	B2LYK5	Q6R646
P19021	Q1JPL0	Q9QZH2	P32261	D9IR34	Q6RK58
Q99217	A4IFR8	P63156	Q9CZ52	J7IMY7	Q6RCT2
Q99218	Q3SZR5	O88181	Q6DFX2	Q9GJU2	Q6BCN4
Q5JTC6	A6QQL5	P26453	Q8BVM2	J7IEY4	Q6S5L3
Q8N7J2	Q32KX9	Q05175	Q9QZ10	C6F3X0	Q5EG74
Q8N944	A8NIX5	P82252	P97384	J7IEB9	Q56IJ7
Q6DCA0	E1BF81	P97876	Q99JG3	L0CF58	Q5MGR8
Q9UKV5	P86437	D4A7E1	P10107	Q9BDD6	O19201
Q86WK6	Q17QF9	Q63690	P07356	G3ER51	Q5MGS0
Q86SJ2	P00730	Q80ZG6	O35639	Q3KRV7	Q5XQS1
Q86WK7	P00732	Q99MH9	P97429	M4MJT4	Q3I237
Q16671	Q2KIG3	Q9ESS6	P48036	Q70L02	Q3I236
Q9Y4X0	E1B9D8	Q63767	P14824	Q9GJR4	Q49JI1
Q8IY45	Q58CX9	Q3ZB98	Q07076	G3EMA5	Q32Y14
Q9BXJ7	P04836	P54690	O35640	C0JXB7	Q2PQK5
Q8IY63	Q2KJ83	O35854	Q9JHQ0	K0FAD4	Q0PGY0
Q9Y2J4	Q0II73	Q91XT5	O35298	A8QKC3	Q1HHV4
Q4VCS5	Q17QK3	Q00972	Q8JZQ5	Q0QBF7	Q0Z807
Q9H4A4	Q3SZD7	Q9QYN5	Q812C9	Q0QBH3	Q1W1D5
P23109	A4IFA7	P49950	O70423	Q0QBG3	A0MPV4
Q01433	Q8MJK1	D4A1J4	Q64133	Q3S4W2	A0MPU9
Q01432	Q29S20	P29147	Q8BW75	Q19BK5	A0MPV3
Q07075	Q32PB5	P23363	O54754	G8FNR8	A1ILA2
P49418	Q0VCL9	Q91XJ1	Q5SGK3	Q6PR47	Q0GC31
P28838	Q2T9Y1	O88881	G3X982	Q53YS7	A0SWQ4
P15144	A7E369	O35152	Q3TYQ9	G5D6Q8	Q076H7
Q8N6M6	Q3ZC62	Q62896	Q61548	H9A6I0	Q06B57
Q6Q4G3	Q2YDN4	Q3MKQ2	O35643	C7T4Y2	A2TEE5
Q9C0C7	Q1LZ89	Q3MKQ1	P22892	J7IFC9	A4GX98
P30533	Q2NL23	Q6PDU5	O88512	E4WMB7	A5JQD5
Q6UX39	Q3SZX9	Q3MKP9	P35585	C5IWT3	A5JST1
P04745	Q3SZB5	Q5PQN2	Q9WVP1	Q307F6	A4UTK9
P19961	Q2TBV6	Q02435	P61967	Q2PPE0	A7U7P1
P04746	A2VE00	Q9ET32	Q9DB50	Q0Q551	A5JSS7
Q400G9	Q5EA37	Q8CFC4	Q7TN05	Q0Q550	Q0GQG2
Q86W34	Q2T9M4	P06760	P17426	B2LYL1	A7UMZ1
Q8IZ07	Q17QR4	P70562	P17427	B2MVY1	A4UTK6
Q86YJ7	Q0VCP9	O35780	P34056	G3LUQ4	A5JTT2
Q8N6S4	A7MBH5	O35779	Q9DBG3	H9CJU2	A9YUB7
Q6ZTN6	Q32LM7	Q71HP2	Q61313	B3VSB9	A5JSS3
Q8IVF6	Q0P5D1	O09171	Q91ZK0	A7L5D1	A9X894
A2A2Z9	A4IFI1	Q68FT5	Q61312	E0A298	A6N6W8
Q9BXX3	Q2T9U9	P55062	Q6VUP9	Q6DKR0	B0FY05
Q5CZ79	A1A4P9	Q3KR97	P84091	C8BKD3	B2CZF2
Q9BXX2	Q2YDH9	Q9JLT6	P62743	C5IWT0	B0BL70
P39687	Q2T9Z6	P46844	Q9Z1T1	M1JTN7	A9UCL9
Q92688	Q0VC19	D4A631	Q9JME5	Q009B1	B5LSV7
O43423	Q2T9P5	Q7TSU1	O54774	A0MPT8	B5KLQ0
O95626	Q1RMI8	O08839	Q9JKC8	U3MSX0	B2YKX6
Q9BTT0	Q32LJ0	Q68FR2	Q8R2R9	E7CV29	B5LBE7
Q69YU3	Q3SZX8	Q68FW8	Q9DCR2	B6VIH4	B4XH72
A6NCL7	E1BM70	Q9JHY7	Q8BSZ2	I6T5S6	B4XR24
A5PLL1	A6QQM8	P97583	Q3U3N6	B7VBV2	B5LV43
P0C6C1	Q3ZC50	P25023	P56380	I6TZT5	B6V9Y9
A6QL64	Q5E9Q3	D3ZKU7	Q9WV76	F1CGV3	B4XH71
Q5JPF3	Q05B58	Q32WR5	Q80V94	M4SYY9	B6E305
Q8N2N9	Q29RU3	B2GV52	Q9JKC7	C8BKE1	B6E306
P54802	A4FUI1	Q4V8A6	Q9WVL1	D3U1F9	B4XH75
Q9UJX6	Q2T9W3	P62950	Q3TAP4	E0A292	C3V6P1
P10275	Q2TA16	Q4KM52	Q8BJ63	E0A2C5	C3SB63
P16860	A6QNP9	P70645	Q9D742	R9ZY22	B4Y7J3
P23582	Q0II65	Q9EPW1	Q3U829	R9ZUS5	C3VP49
Q9P2R3	Q2HJ91	Q8K589	O88879	A9LHK1	C7E4R1
P01160	Q2TA00	Q4AEG6	B2RUJ5	D6C4M6	D1MFS2
Q9UNK9	Q2TBX7	P49001	P98084	A9LHK7	C7EWL5
Q5VTE6	Q29RS0	P55108	O88888	A9LHK6	C0LJG9
P03950	Q2KIZ9	P49002	Q9QXJ1	B5SZL5	C7S868
O95841	Q2T9P9	Q06826	Q9DBR4	G8Z9W6	D0VFV8
Q9UKU9	Q08DE1	Q04906	Q8R1C9	A6N8N9	D0VU02
Q9Y5C1	Q0VD05	Q78EA7	Q9DAX9	B0EXV0	E7FKN6
Q9BY76	A5PJG7	D4ABH7	Q8K2H6	B2MVW4	D2XNQ4
Q86XS5	P41520	Q6AYJ2	Q9CPX9	B9VH03	D6MWQ2
Q8NI99	Q9TTS6	Q9QZU7	Q8R034	C5IWU0	D2XZ62
O43827	Q8SQB1	Q792S6	P60007	M1LF60	E7EC28
Q15389	P28291	Q562C2	Q9CPV2	S4TZR5	E7FKQ0
O15123	Q8SQA6	Q5M864	P53995	T2FK02	D6R263
Q9Y264	Q17QA1	Q6AXW0	Q9Z1K7	A8IW56	D9J0E2
P01019	O97919	Q5PQP4	Q91W96	M1K433	E1CEU5
E9PGG2	Q09141	A1A5P0	Q8BTZ4	M1JP32	E1CEU2
P16157	P30274	Q8K4I4	Q9WVM3	Q8MJZ0	E1CET5
Q01484	Q1LZG6	Q63471	Q3U128	A7UHZ4	E1CEV1
Q12955	O77689	A0JPN3	Q61315	D2CN65	E1CEV3
Q7Z5J8	Q3ZCK5	Q05704	Q8R146	B0LRP7	E1CEV7
Q9NU02	Q2KI22	Q05701	Q9R0R4	C5IJA9	D7PW34
Q8N957	Q0P5D3	Q6AXU0	P28352	C8BKC2	E2CT05
Q8IWZ3	Q3MHH5	Q9Z1N4	Q68G58	E1CEX6	D9IFC6
Q9HCJ1	Q5E9K7	O54952	Q8BVF7	U5PR56	E7FKP6
Q8NAG6	A5PK16	O35923	Q8C7N7	B3F588	E9JWH7
Q8NFD2	Q5E9I1	B2RYM5	Q9DCZ9	A3QUN4	E9JWH8
Q86XL3	Q3ZBL9	Q6MGA9	O35841	E1CEW4	F2X356
Q15327	Q6T8E9	D4A7T3	Q9WV08	A6YT17	E5FYG5
Q9GZV1	Q2HJ17	Q8CJB9	Q9D842	A9LHI8	F6K8I2
Q9Y2G4	Q5MD62	Q6P7Q1	Q03157	A3QU55	F4ZW68
Q92527	Q0II78	Q4V8D6	Q06335	A0SWN4	F2X911
Q96BM1	Q1RMS0	Q5PPK1	Q9D7N9	A6NBZ0	F4YZS9
Q6ZW76	Q0VD30	Q5M7T3	Q00623	Q0QBF9	F8RKS1
Q68DC2	Q2YDG2	Q925T8	P09813	Q6V652	G0Y6S8
A6NFN9	A2VDY4	Q8K1M8	Q8VBT6	Q3LUC5	J7GTX6
Q9P2S6	Q17QE0	Q8K1M7	P34928	A0N013	I1ST03
Q8IV38	Q2KIR0	Q4V8K5	Q8C7G5	R9ZWB8	F8UVM8
Q9H8Y5	Q2T9M0	Q8K418	E9Q414	Q3LUC3	J7H1K3
Q9NQW6	Q0II83	B2DD29	P06728	B2LYL4	G0ZS13
Q99873	A0JNN8	D3ZML2	Q05020	A0SWR3	G1DFN2
P55345	Q2YDG3	Q4QQT6	P33622	C3VD25	G1DFS4
O60678	Q95122	Q5FVJ6	Q61268	A0N010	G1DFR2
O14744	Q3ZBH3	Q8R2H3	P51910	R9ZWV6	G1DFS1
Q96LA8	Q9BH13	O88778	P08226	H9A6H7	G1DFT1
Q9NVM4	Q28071	Q6P6S3	Q91V80	C9EJ84	G1DFU0
Q9NR22	A8WH74	Q63072	Q01339	B9TUA7	G1DFV0
Q6P2P2	A6QNY1	Q811A2	Q9Z1R3	B0EXU8	G1DFT6
Q9NW15	P26201	Q5PQR3	Q78IK4	C6KDW9	G1DFV6
Q5XXA6	A6H754	Q6AXU1	Q9DCZ4	Q1AFL5	G1DFR6
Q9NQ90	Q2KHY8	Q5FVF9	Q9CQW7	C6ETB8	G1DFV7
Q9BYT9	Q28072	Q63073	Q09PK2	B9TUA8	G1DFS7
Q32M45	Q28073	P27049	Q9JM54	D0ETI3	G1DFV2
Q75V66	Q28074	O88677	Q7TQC5	D0ENQ3	G1DFX8
Q4KMQ2	P51749	Q6PNM1	P08030	D3U7X0	G1DFY4
Q6IWH7	Q29423	Q6MG97	Q8CHJ2	Q1AFH2	G1DFY8
Q9HCE9	Q9N0K1	Q4QQU1	Q8BHH1	B3GN12	G1DFZ6
A1A5B4	Q58DM3	O70454	Q02013	A5LID2	G1DG03
P16066	Q28199	Q03248	P56402	Q5ECG8	G1DG09
P20594	P19238	Q80WL2	Q8R2N1	Q712V9	G1DG17
P17342	Q9XSK2	Q6P7P5	P55088	Q1AFW6	G1DG13
Q9NXR5	P40293	Q9WTT7	Q9WTY4	Q712W0	G1DG41
Q6UB99	Q3ZCD0	P15393	Q8C4A0	Q1AFG2	G1DG46
Q6UB98	P31783	P30099	O54794	Q71VN8	G1DG22
Q6P6B7	Q8SQA4	P30100	P56404	Q71VP3	G1DG84
O75179	P30932	Q499P3	Q9JJJ3	Q71VP0	G1DG92
Q9H560	A1A4R8	Q9JJ05	Q8CFQ3	D0ENQ5	G1DG93
Q5VYY1	Q3SZT7	P31720	Q9D416	C5ISA2	G1DG43
Q8TF21	A7Z061	O35796	Q640N2	C5IS97	G1DG97
Q86SG2	Q5EAC6	P31721	Q9D385	D7RFH8	G1FG63
Q9UPS8	Q2KJ93	P31722	Q9JKW0	O97631	G1DGD2
Q96NW4	Q2KJC1	Q9ET61	Q9JM93	D9IR37	G1DGC5
O15084	Q29RT4	Q5XIG2	Q8BH07	E5FXR5	G1DGE7
Q8N6D5	Q32PH1	Q5FVH0	P04627	A6ZE99	G1DGF3
Q8N7Z5	Q8WN91	Q3T1I2	Q6PGD0	E1XUM4	G1DGE1
Q9BQI6	Q58D45	Q6IE64	Q4LDD4	J7H212	G1DGG8
Q7Z3H0	Q2TBL8	Q6P6T1	Q8BZ05	C8BKC5	G1DFV8
Q8N283	E1BB50	P27653	Q8R5G7	D9IR41	G1DG95
Q7Z713	E1BB52	Q5RK03	Q99MK8	D9IR43	G1DGF6
Q6AI12	P48734	Q66HA5	Q3UYH7	G3KL20	J9QGI9
Q53RE8	Q5E9Y0	Q5FVK6	Q9R0Q6	C0IZ95	G1DGA3
Q8N9B4	Q32KY4	O55197	Q9WV32	E2J5J9	G1DGD6
Q8N8A2	Q02399	Q5BJM7	Q505B7	S4SAC8	G3FAK1
Q5TZF3	Q5EAB2	A1L1K4	Q9WV31	G8Z9W4	G1DG75
Q86W74	Q58CN7	Q63514	P31955	R4KXA8	G1DGH9
Q8WVL7	Q2KJD8	Q63515	Q8CHG5	A9CY41	I6WB42
Q9ULJ7	Q29RV0	Q641Y1	P84078	A9CYE9	G1DGC1
Q8N9V6	Q3SZU4	P97520	Q8BSL7	R9ZUP3	G3CUL8
Q8NB46	Q0VCH3	Q695P6	P61205	D1LYF5	I6TE27
Q6NXT1	Q2YDL7	Q8R1R5	P61750	R9ZWG5	G3CE73
Q3KP44	A0JNC1	Q5XII8	P84084	R9ZUS0	G8DZS5
Q9BZ19	Q0II29	Q5U2R2	P62331	R9ZUF5	I7A6K0
A6NGH8	Q17QJ2	Q5XIU7	Q9EPJ9	R9ZUP5	I7AHC8
A6NC57	Q3ZBS1	Q5XI94	Q99K28	R9ZWU6	I6WY32
C9JTQ0	A4FUB0	Q3ZCQ0	Q9D8S3	R9ZWD5	I7ARG8
B4E2M5	Q3ZBG8	Q498R7	Q8K221	Q6PVS4	I6VSD2
E5RJM6	Q3T146	Q3KRF3	Q8BXL7	E3UVV9	I7BF59
Q9H9E1	A0JN62	Q6AY88	P97433	R9ZXZ4	H6WJI4
P61109	Q9TU23	Q5M951	Q8BW86	C6F3W6	H6WS81
Q92625	O02754	B1H283	Q66JY6	A7UHZ2	H6UR92
Q7Z6G8	O02755	D4A2Q0	A2AWP8	B2MVX2	H9TKZ8
Q8N8V4	O02756	P54290	Q61176	A9CY66	K4MPT3
P01008	Q3T0B9	Q8CFG6	O08691	B2MVW7	H2ETE9
Q9H6X2	Q29461	Q8CFG5	Q3UL36	B6UV59	K7R0B6
P58335	Q28153	Q91ZS3	A1IGU4	B9VGZ7	H9TU39
A6NF34	Q08E07	O88480	Q80VK6	B7TA00	K4MXL7
Q9UJ72	P30122	O88751	Q3UPH7	D8X187	K9MLZ7
P50995	P49449	Q66H96	Q61210	C3V6M4	H2ET88
P27216	Q3T0L1	Q06BI3	Q60875	C8BKD4	K9K620
P04083	Q5EA18	Q68FX6	Q91X46	H9TN93	K9K4W9
P07355	Q2TBH1	P54282	Q7TNR9	J9SVG9	K9MMZ7
P12429	Q32LL9	Q02294	Q8K4I3	Q9N137	M4TPW7
P09525	Q3ZBK8	P22002	Q9ES28	Q6H8Q2	R9SA15
P08758	Q2TBR7	P27732	Q9Z206	Q5S055	M4MFG2
P08133	Q2KIW5	Q07652	Q3UTH8	Q27H92	M4N9R3
P20073	Q2NKU0	O54898	Q8C033	Q5MCZ5	R4N0I3
P13928	A6H7C9	Q9EQ60	Q8R4H2	Q6PR45	L7RFG6
O76027	F1MUG2	Q9Z0Y8	Q5FWH6	Q6PVS0	M1PEQ4
P28039	Q08DB0	Q02485	Q3U5C8	B8ZY39	M1H5H4
P19801	Q865V0	P54283	Q80U35	E7CV38	F2X904
O75106	Q3ZBF8	Q8VGC3	Q6P9R4	Q5MCZ6	S6AZG6
Q16853	Q5E9R6	P54287	Q8BWA8	A5HJR9	S6B585
P21397	Q32LE3	Q5XI53	Q9CWR0	A4ULE2	S6B0I8
P27338	Q2TBN3	Q66HR5	Q8BGK2	A0SWM0	H2DGR1
Q06278	A2VDZ5	Q704S8	Q8CG72	C5IWT7	S6BU20
O60641	Q32KT5	P55281	Q8C142	C5IS96	T1WH39
Q63HQ0	Q2TBK0	Q5DWV1	Q9Z1K5	Q27H89	S6BSI4
Q10567	Q29RL1	Q63315	A2BH40	Q68G92	V9PB41
O43747	A3KMX8	P58365	Q9Z1K6	A0SWM6	G1DGE8
O75843	P81187	Q9R0T4	Q62431	A0SWP4	G8HXZ9
Q9BXS5	Q3T0A3	Q9Z1Y3	Q9Z1N7	B3F594	G8JEB0
Q9Y6Q5	Q28085	Q63149	A6PWV5	O77643	I1TJV1
P61966	Q8HXY9	P55280	A2CG63	Q9N276	T2B8G0
P56377	O02751	Q5DWV2	Q3U108	C0LJE3	V9QFK5
Q96PC3	P35071	O54800	Q8BM75	B5LVQ1	T1RUT6
O95782	Q1LZE8	Q1WIM2	Q99NG0	Q712W1	Q19KS3
O94973	Q3SZA2	Q1WIM3	Q8CG76	R9Y0L2	G1DFQ9
P05549	A0JNL1	Q1WIM1	Q9QXJ4	R9ZWE4	Q6S5K7
P63010	Q2T9X5	Q66HB6	Q6P3A9	R9ZUV4	A4UQV5
Q92481	E1BGN7	B0BNN3	Q3SXC5	R9ZXX9	S6BTZ1
Q7Z6R9	Q58DW2	P27139	Q8BGR6	R9ZY12	B4XH81
Q92754	Q5E969	P14141	P61211	R9ZUZ1	D2KMJ2
Q6VUC0	Q2KID8	P48284	Q9D0J4	R9ZY63	A1YW87
Q96CW1	E1BC52	P43165	Q9WUL7	G9BZG9	A2TEE6
P53680	Q0VCV7	Q66HG6	P61213	R9ZXT6	Q52QU4
O00203	A8YXZ5	Q5PPN4	P61208	R9ZUZ7	Q5YD57
Q13367	Q2NL11	Q5RJQ8	Q99PE9	A2TE31	U6A6A5
O14617	A8E4L3	P07171	Q80ZU0	Q6QME2	Q863D6
Q9Y2T2	P61603	P47728	Q9D4P0	D7REY2	Q6E218
P53677	P30922	P01256	Q6P068	B0EXS7	B7S4L3
Q92572	P31081	P10093	O88848	Q49JI4	A9UFM4
P59780	Q0IIH4	P32214	Q9CQW2	Q863L0	E1CEU9
Q96N21	Q27972	P01257	Q8VEH3	Q9TU07	C6KYM7
P50583	Q5E9D3	Q62736	Q91YI0	B7T160	B5KLP8
Q9Y6B7	Q32L35	Q5XI58	Q9D0L7	C6F3W7	D2XNQ5
Q9UPM8	Q17Q91	Q5U206	Q80X86	Q6V643	Q6RCT3
O00189	Q3B7N1	P62161	Q9D7A8	R9ZW98	A8IDC2
Q9Y587	Q95M17	Q63118	Q3URY6	R9ZY38	F8R0Z4
Q2VPB7	Q5EAB4	P18418	A2AU72	J9XHT3	B4XR25
Q9H0R1	Q17QN0	O35783	B2RY50	E0A2B2	Q7YS13
Q9NUS5	P32749	P35565	Q5EBP3	Q1AFH1	B4XR22
O43299	Q5E994	P58821	Q3UJZ3	E0A290	K0A6K0
O14727	Q3SX42	Q63092	Q8BNU0	E0A2E7	Q1W1D6
Q02410	A2VDY3	D3Z8E6	Q9DBR3	A9LHK5	Q6R638
Q99767	Q58CS7	Q9ES66	Q9D2I5	Q29410	K0P736
O96018	Q3SYS6	Q4V8Q1	Q9CX83	B0LXL3	F6M3U6
O00213	Q1LZE6	Q5BK10	Q6A058	E0A2C4	F8UX49
Q92870	Q29RL2	P97571	Q8BHS6	D1LYF8	Q28325
O95704	Q3SYW9	Q07009	Q3UZB0	L7PA78	G1DGF7
Q92624	Q2HJG7	P16259	Q8K3A6	B6VEZ9	Q49JH2
Q9UM13	P00794	Q8R4C0	Q61324	F4MJ46	F8UN03
Q9NYG5	Q2NKS9	O88501	P53762	J9Q9B8	Q3HTF3
Q9BS18	Q1JP73	Q78EJ9	Q8C6B9	D3GN34	Q95MF1
P60006	Q5EA48	O35920	Q9QZB7	A9CXX6	J9XNY0
Q96DE5	Q32P67	P63100	P56212	C3VC56	Q5MGR5
Q9H1A4	Q32L77	P28470	Q9DCB4	Q0Z8T2	G1DG48
O95996	A0JNN6	P97536	P61161	D9IR39	G1DFN4
Q9UJX5	Q32PJ6	Q9R0L4	Q641P0	B0FZL9	G1DGB4
Q9UJX4	Q17QE5	Q8K4Y7	Q99JY9	Q9MZS7	H9TKZ2
Q9UJX3	Q3T191	Q08163	Q9D898	D3JUT9	G3CCY8
Q8J025	F1MN90	P52481	Q80US4	C5IFA1	H6WNB0
Q8NCL9	A6H7E2	Q6AYC4	Q9D864	G9HPB8	H9TKZ3
P25054	Q3ZBU2	O54960	Q8R2S9	Q072I0	F4Y4Z5
Q9ULZ1	Q05B71	Q5M9G3	Q9CVB6	Q2I2K7	K9LQQ8
P27695	Q2HJ53	Q62717	Q9JM76	A7LK11	G1DG81
Q9UBZ4	Q29RK1	Q5XI32	P59999	B9VH02	G8FSB7
Q96BI3	Q9BDI3	Q9EPY0	Q9CPW4	O97963	A0MPV0
Q8WW43	Q0VCT9	Q5U2X0	Q9D0A3	Q30835	I1Z737
Q9BZZ5	Q2HJ78	Q4AE70	Q8BWG8	Q19BK7	I1W1N4
P35414	Q2KIB7	D4A7U2	Q91YI4	Q5GGX7	Q09GP3
Q8IW19	P0C920	P49192	Q9EQP6	Q8MHZ5	A0A2H2
Q96LR9	A6QPC0	P02661	Q99KN1	E7BQS8	A1YZ36
Q06481	Q32KT7	P02665	Q9D668	A4ZG13	O19215
P51693	Q2T9Q3	Q8K3X0	Q7TPQ9	Q6V649	Q07A05
Q9HDC9	Q32KQ7	P04468	Q497K5	E4WMB4	Q0PMA2
P02647	Q2HJH3	P43527	P20443	G9I8W4	S6BTT4
P02652	Q2T9M9	P55215	P50428	G8G1S7	G1DFZ7
P06727	A4IFA8	P55213	P50429	E0A2A0	J7GVS9
P02654	Q2HJH8	O35397	Q3TYD4	E0A2C6	Q9XSQ9
P04114	Q32L37	Q920D5	Q32KI9	E7CV33	A5YVE0
Q0VD83	Q3ZBP0	P19633	Q9D2L1	D2CN63	B4XR14
Q6Q788	Q148G8	P51868	Q8BM89	R9ZUS6	G1DG32
P02655	Q2KIL8	P48442	Q9Z0L2	G3FAK7	G3CS35
P08519	Q32P68	D3ZZ07	Q9D0U9	R9ZXX2	G1DGE0
P02656	A8WFF7	P04762	P98203	S4SAL7	G1DFQ2
P55056	A5PK62	P00787	O35085	T1TE38	D2DR62
P05090	A7MBG3	P80067	P50294	R9ZWI3	A5JSS0
P02649	A5D7T0	P24268	P50295	T1TFB2	I3W7D7
Q13790	A5D7U0	P16228	P50296	B2LU21	Q2Q6T6
P02749	Q1RMP9	P17977	Q91WU5	I1WXR3	D0PQM4
O14791	A5PK21	P00786	Q9WV54	J7GWF2	M9ZKW6
Q9BPW4	Q0P5A5	M0RAU5	Q9JHE3	E3VW37	U3GR54
Q9BQE5	Q2KJI1	Q63088	Q9QWY8	J9UXY3	G1DG20
Q9BWW9	Q2KJ69	O35186	Q7SIG6	C5HK62	G1DGC0
Q9BWW8	Q2TBR9	P07154	Q5U464	P79360	F4ZW69
O95445	Q58CQ0	Q9QZE3	Q91ZT7	C5IWU6	G3EHG6
O95236	Q2TBJ0	Q02765	Q9CQ31	C7BDW8	Q6R651
Q6UXV4	Q17QN8	Q9R1T3	Q9D738	W5NSA4	A0FI82
Q9BUR5	Q32KY7	P41350	Q8VBX0	Q9N1B9	Q8MIZ4
Q96IL0	Q3SZX7	Q2IBC5	Q8C6Y6	Q5MIA4	I7BBP6
Q8IVJ8	Q32LI3	P51638	Q8VHS6	Q5MIA5	C6ZEA4
F7VJQ1	Q2NL33	B2GUZ5	Q8VHS5	A8IW63	D2DR61
Q53RT3	P42916	Q3T1K5	Q8VHP9	Q5MIA2	E1CEU3
Q13794	Q8MHZ9	Q9WUV6	Q8VHA6	A6YQW0	S6B016
Q7Z2E3	A0JNI5	Q5HZX7	Q9WV74	B5A7E0	E9N3C6
P07741	Q0VCS6	Q6AY04	Q8K0L0	E5LFF4	C6KJ77
Q8IXF9	Q28008	Q5U2Y8	Q9WV72	C5IWV1	T2B6W6
A6NM10	Q3LUH2	Q6AXP4	Q9WV71	C7BDW2	G1DFN3
Q96PS8	Q49BZ4	P31211	Q9D1A4	F5AY94	G5CC03
Q8NBQ7	P04973	Q8K4S7	Q91ZU1	Q52NW3	D1MCA8
