# Supplementary material for: ProteINSIDE to Easily Investigate Proteomics Data from Ruminants: Application to Mine Proteome of Adipose and Muscle Tissues in Bovine Foetuses
Source: PLoS One. 2015 May 22;10(5):e0128086. doi: 10.1371/journal.pone.0128086 (PMC4441380; doi:10.1371/journal.pone.0128086)
Supplement: S2 Table — (XLSX) [file pone.0128086.s002.xlsx]

## Sheet: Dataset_Taga (AT)
Query	Protein Accession Number	Protein ID	Gene Name
317	P31946	1433B_HUMAN	YWHAB
334	P62258	1433E_HUMAN	YWHAE
346	P61981	1433G_HUMAN	YWHAG
1169	P31937	3HIDH_HUMAN	HIBADH
2146	P01009	A1AT_HUMAN	SERPINA1
3712	Q96IU4	ABHEB_HUMAN	ABHD14B
3919	Q9UKU7	ACAD8_HUMAN	ACAD8
3944	P49748	ACADV_HUMAN	ACADVL
4025	P07108	ACBP_HUMAN	DBI
6301	Q99798	ACON_HUMAN	ACO2
8225	P63261	ACTG_HUMAN	ACTG1
8422	P61163	ACTZ_HUMAN	ACTR1A
10128	Q15848	ADIPO_HUMAN	ADIPOQ
10140	P55263	ADK_HUMAN	ADK
12350	P49189	AL9A1_HUMAN	ALDH9A1
12520	P02768	ALBU_HUMAN	ALB
12604	P05091	ALDH2_HUMAN	ALDH2
14893	P28838	AMPL_HUMAN	LAP3
16350	P04083	ANXA1_HUMAN	ANXA1
16370	P12429	ANXA3_HUMAN	ANXA3
16375	P09525	ANXA4_HUMAN	ANXA4
16382	P08758	ANXA5_HUMAN	ANXA5
17657	P02647	APOA1_HUMAN	APOA1
17682	P02652	APOA2_HUMAN	APOA2
31439	O75947	ATP5H_HUMAN	ATP5H
33766	P06576	ATPB_HUMAN	ATP5B
47895	P00918	CAH2_HUMAN	CA2
49631	P47756	CAPZB_HUMAN	CAPZB
51167	P52907	CAZA1_HUMAN	CAPZA1
51191	P47755	CAZA2_HUMAN	CAPZA2
58971	P10809	CH60_HUMAN	HSPD1
63250	Q9Y696	CLIC4_HUMAN	CLIC4
67181	P12110	CO6A2_HUMAN	COL6A2
71305	Q5HYK3	COQ5_HUMAN	COQ5
71452	O75208	COQ9_HUMAN	COQ9
72551	P13073	COX41_HUMAN	COX4I1
72600	P20674	COX5A_HUMAN	COX5A
80025	Q02221	CX6A2_HUMAN	COX6A2
80781	P00167	CYB5_HUMAN	CYB5A
90396	P06132	DCUP_HUMAN	UROD
90792	O94760	DDAH1_HUMAN	DDAH1
96750	P09622	DLDH_HUMAN	DLD
102781	Q16555	DPYL2_HUMAN	DPYSL2
107587	Q13011	ECH1_HUMAN	ECH1
107603	P40939	ECHA_HUMAN	HADHA
107637	P30084	ECHM_HUMAN	ECHS1
111753	P49411	EFTU_HUMAN	TUFM
114943	P06733	ENOA_HUMAN	ENO1
115888	P14625	ENPL_HUMAN	HSP90B1
117543	O94905	ERLN2_HUMAN	ERLIN2
121073	P09467	F16P1_HUMAN	FBP1
123026	P15090	FABP4_HUMAN	FABP4
124418	Q96GK7	FAH2A_HUMAN	FAHD2A
127526	P02771	FETA_HUMAN	AFP
128296	P02679	FIBG_HUMAN	FGG
129017	Q02790	FKBP4_HUMAN	FKBP4
137182	P11413	G6PD_HUMAN	G6PD
138491	P51570	GALK1_HUMAN	GALK1
138656	Q14697	GANAB_HUMAN	GANAB
143789	P50395	GDIB_HUMAN	GDI2
143797	P52565	GDIR1_HUMAN	ARHGDIA
153560	P21695	GPDA_HUMAN	GPD1
153911	P43304	GPDM_HUMAN	GPD2
156483	P38646	GRP75_HUMAN	HSPA9
162993	P68871	HBB_HUMAN	HBB
165103	P13716	HEM2_HUMAN	ALAD
167762	Q6NVY1	HIBCH_HUMAN	HIBCH
173563	P61978	HNRPK_HUMAN	HNRNPK
177865	P04792	HSPB1_HUMAN	HSPB1
178949	O43464	HTRA2_HUMAN	HTRA2
181894	P50213	IDH3A_HUMAN	IDH3A
181920	O75874	IDHC_HUMAN	IDH1
184518	P63241	IF5A1_HUMAN	EIF5A
188039	Q16891	IMMT_HUMAN	IMMT
189687	Q9H2U2	IPYR2_HUMAN	PPA2
193831	P26440	IVD_HUMAN	IVD
197624	P12277	KCRB_HUMAN	CKB
205715	P07195	LDHB_HUMAN	LDHB
212887	P20700	LMNB1_HUMAN	LMNB1
212891	Q03252	LMNB2_HUMAN	LMNB2
221438	P48163	MAOX_HUMAN	ME1
224465	P40925	MDHC_HUMAN	MDH1
238950	Q10713	MPPA_HUMAN	PMPCA
245553	O75431	MTX2_HUMAN	MTX2
251305	Q14764	MVP_HUMAN	MVP
259062	O95299	NDUAA_HUMAN	NDUFA10
259235	P28331	NDUS1_HUMAN	NDUFS1
259254	O75306	NDUS2_HUMAN	NDUFS2
259279	O75489	NDUS3_HUMAN	NDUFS3
259344	O00217	NDUS8_HUMAN	NDUFS8
259373	P19404	NDUV2_HUMAN	NDUFV2
276926	P12694	ODBA_HUMAN	BCKDHA
277042	Q02218	ODO1_HUMAN	OGDH
277097	P36957	ODO2_HUMAN	DLST
277156	P10515	ODP2_HUMAN	DLAT
277259	P11177	ODPB_HUMAN	PDHB
279907	Q92882	OSTF1_HUMAN	OSTF1
285198	Q99497	PARK7_HUMAN	PARK7
286200	P05166	PCCB_HUMAN	PCCB
287773	P30101	PDIA3_HUMAN	PDIA3
292443	P18669	PGAM1_HUMAN	PGAM1
293962	P35232	PHB_HUMAN	PHB
297498	O60240	PLIN1_HUMAN	PLIN1
299917	P00491	PNPH_HUMAN	PNP
304717	P32119	PRDX2_HUMAN	PRDX2
304724	P30048	PRDX3_HUMAN	PRDX3
304736	P30044	PRDX5_HUMAN	PRDX5
304744	P30041	PRDX6_HUMAN	PRDX6
308445	P25786	PSA1_HUMAN	PSMA1
308484	P25788	PSA3_HUMAN	PSMA3
313504	Q06323	PSME1_HUMAN	PSME1
313510	Q9UL46	PSME2_HUMAN	PSME2
314843	Q8N8N7	PTGR2_HUMAN	PTGR2
320768	P11498	PYC_HUMAN	PC
325327	P31930	QCR1_HUMAN	UQCRC1
331647	Q15293	RCN1_HUMAN	RCN1
410089	P08865	RSSA_HUMAN	RPSA
416995	Q13228	SBP1_HUMAN	SELENBP1
418722	P31040	SDHA_HUMAN	SDHA
422004	Q15019	SEPT2_HUMAN	2002-09-01
427867	P00441	SODC_HUMAN	SOD1
428099	P04179	SODM_HUMAN	SOD2
434977	P31948	STIP1_HUMAN	STIP1
435265	Q9Y3F4	STRAP_HUMAN	STRAP
435808	Q9P2R7	SUCB1_HUMAN	SUCLA2
438034	P49588	SYAC_HUMAN	AARS
452428	P37837	TALDO_HUMAN	TALDO1
454216	P07437	TBB5_HUMAN	TUBB
455065	P17987	TCPA_HUMAN	TCP1
456182	P55072	TERA_HUMAN	VCP
457760	Q5T1C6	THEM4_HUMAN	THEM4
458118	Q9BWD1	THIC_HUMAN	ACAT2
460266	P25325	THTM_HUMAN	MPST
463650	Q9NYL9	TMOD3_HUMAN	TMOD3
465664	P60174	TPIS_HUMAN	TPI1
466077	P09493	TPM1_HUMAN	TPM1
466104	P06753	TPM3_HUMAN	TPM3
466134	P51580	TPMT_HUMAN	TPMT
467279	P02787	TRFE_HUMAN	TF
476079	P02766	TTHY_HUMAN	TTR
490940	P45880	VDAC2_HUMAN	VDAC2
493054	P08670	VIME_HUMAN	VIM
493069	P18206	VINC_HUMAN	VCL

## Sheet: Cluster 1 - Taga (AT)
Spot	Protein	UniProt ID	UniProt AC	Gene Name	Cluster
ID_0955	Serum albumin, the main protein of plasma, has a good binding capacity for water, Ca(2+), Na(+), K(+), fatty acids, hormones, bilirubin and drugs. Its main function is the regulation of the colloidal osmotic pressure of blood. Major zinc transporter in plasma, typically binds about 80% of all plasma zinc.	ALBU_HUMAN	P02768	ALB	1
ID_1227	Serum albumin, the main protein of plasma, has a good binding capacity for water, Ca(2+), Na(+), K(+), fatty acids, hormones, bilirubin and drugs. Its main function is the regulation of the colloidal osmotic pressure of blood. Major zinc transporter in plasma, typically binds about 80% of all plasma zinc.	ALBU_HUMAN	P02768	ALB	1
ID_1741	Binds to actin filaments in muscle and non-muscle cells. Plays a central role, in association with the troponin complex, in the calcium dependent regulation of vertebrate striated muscle contraction. Smooth muscle contraction is regulated by interaction with caldesmon. In non-muscle cells is implicated in stabilizing cytoskeleton actin filaments.	TPM3_HUMAN	P06753	TPM3	1
ID_1416	Involved with LARP6 in the stabilization of type I collagen mRNAs for CO1A1 and CO1A2.	VIME_HUMAN	P08670	VIM	1
ID_1227a	Molecular chaperone; assists the folding of proteins upon ATP hydrolysis. As part of the BBS/CCT complex may play a role in the assembly of BBSome, a complex involved in ciliogenesis regulating transports vesicles to the cilia. Known to play a role, in vitro, in the folding of actin and tubulin.	TCPA_HUMAN	P17987	TCP1	1
ID_1098	Lamins are components of the nuclear lamina, a fibrous layer on the nucleoplasmic side of the inner nuclear membrane, which is thought to provide a framework for the nuclear envelope and may also interact with chromatin.	LMNB1_HUMAN	P20700	LMNB1	1
ID_1778	F-actin-capping proteins bind in a Ca(2+)-independent manner to the fast growing ends of actin filaments (barbed end) thereby blocking the exchange of subunits at these ends. Unlike other capping proteins (such as gelsolin and severin), these proteins do not sever actin filaments. Plays a role in the regulation of cell morphology and cytoskeletal organization.	CAPZB_HUMAN	P47756	CAPZB	1
ID_0712	Catalyzes the attachment of alanine to tRNA(Ala) in a two-step reaction: alanine is first activated by ATP to form Ala- AMP and then transferred to the acceptor end of tRNA(Ala). Also edits incorrectly charged tRNA(Ala) via its editing domain (By similarity).	SYAC_HUMAN	P49588	AARS	1
ID_1642	F-actin-capping proteins bind in a Ca(2+)-independent manner to the fast growing ends of actin filaments (barbed end) thereby blocking the exchange of subunits at these ends. Unlike other capping proteins (such as gelsolin and severin), these proteins do not sever actin filaments.	CAZA1_HUMAN	P52907	CAPZA1	1
ID_1150	One of the major pre-mRNA-binding proteins. Binds tenaciously to poly(C) sequences. Likely to play a role in the nuclear metabolism of hnRNAs, particularly for pre-mRNAs that contain cytidine-rich sequences. Can also bind poly(C) single- stranded DNA. Plays an important role in p53/TP53 response to DNA damage, acting at the level of both transcription activation and repression. When sumoylated, a…	HNRPK_HUMAN	P61978	HNRNPK	1
ID_2234	mRNA-binding protein involved in translation elongation. Has an important function at the level of mRNA turnover, probably acting downstream of decapping. Involved in actin dynamics and cell cycle progression, mRNA decay and probably in a pathway involved in stress response and maintenance of cell wall integrity. With syntenin SDCBP, functions as a regulator of p53/TP53 and p53/TP53-dependent apo…	IF5A1_HUMAN	P63241	EIF5A	1
ID_1117	Lamins are components of the nuclear lamina, a fibrous layer on the nucleoplasmic side of the inner nuclear membrane, which is thought to provide a framework for the nuclear envelope and may also interact with chromatin.	LMNB2_HUMAN	Q03252	LMNB2	1
ID_1523	Blocks the elongation and depolymerization of the actin filaments at the pointed end. The Tmod/TM complex contributes to the formation of the short actin protofilament, which in turn defines the geometry of the membrane skeleton (By similarity).	TMOD3_HUMAN	Q9NYL9	TMOD3	1
ID_1565	The SMN complex plays a catalyst role in the assembly of small nuclear ribonucleoproteins (snRNPs), the building blocks of the spliceosome. Thereby, plays an important role in the splicing of cellular pre-mRNAs. Most spliceosomal snRNPs contain a common set of Sm proteins SNRPB, SNRPD1, SNRPD2, SNRPD3, SNRPE, SNRPF and SNRPG that assemble in a heptameric protein ring on the Sm site of the small n…	STRAP_HUMAN	Q9Y3F4	STRAP	1

## Sheet: Cluster 8 - Taga (AT)
Spot	Protein	UniProt ID	UniProt AC	Gene Name	Cluster
ID_1872	Involved in transport of proteins into the mitochondrion.	MTX2_HUMAN	O75431	MTX2	8
ID_1825	Essential for bone resorption and osteoclast differentiation (By similarity). Reversible hydration of carbon dioxide. Can hydrate cyanamide to urea. Involved in the regulation of fluid secretion into the anterior chamber of the eye. Contributes to intracellular pH regulation in the duodenal upper villous epithelium during proton-coupled peptide absorption. Stimulates the chloride-bicarbonate exch…	CAH2_HUMAN	P00918	CA2	8
ID_1746	Serum albumin, the main protein of plasma, has a good binding capacity for water, Ca(2+), Na(+), K(+), fatty acids, hormones, bilirubin and drugs. Its main function is the regulation of the colloidal osmotic pressure of blood. Major zinc transporter in plasma, typically binds about 80% of all plasma zinc.	ALBU_HUMAN	P02768	ALB	8
ID_1968	Destroys superoxide anion radicals which are normally produced within the cells and which are toxic to biological systems.	SODM_HUMAN	P04179	SOD2	8
ID_1208		PCCB_HUMAN	P05166	PCCB	8
ID_1208a		PCCB_HUMAN	P05166	PCCB	8
ID_1580	Catalyzes the hydrolysis of fructose 1,6-bisphosphate to fructose 6-phosphate in the presence of divalent cations, acting as a rate-limiting enzyme in gluconeogenesis. Plays a role in regulating glucose sensing and insulin secretion of pancreatic beta-cells. Appears to modulate glycerol gluconeogenesis in liver. Important regulator of appetite and adiposity; increased expression of the protein in…	F16P1_HUMAN	P09467	FBP1	8
ID_1210	Lipoamide dehydrogenase is a component of the glycine cleavage system as well as of the alpha-ketoacid dehydrogenase complexes. Involved in the hyperactivation of spermatazoa during capacitation and in the spermatazoal acrosome reaction.	DLDH_HUMAN	P09622	DLD	8
ID_1258	Lipoamide dehydrogenase is a component of the glycine cleavage system as well as of the alpha-ketoacid dehydrogenase complexes. Involved in the hyperactivation of spermatazoa during capacitation and in the spermatazoal acrosome reaction.	DLDH_HUMAN	P09622	DLD	8
ID_1627	Catalyzes an early step in the biosynthesis of tetrapyrroles. Binds two molecules of 5-aminolevulinate per subunit, each at a distinct site, and catalyzes their condensation to form porphobilinogen.	HEM2_HUMAN	P13716	ALAD	8
ID_1825a	Interconversion of 3- and 2-phosphoglycerate with 2,3- bisphosphoglycerate as the primer of the reaction. Can also catalyze the reaction of EC 5.4.2.4 (synthase) and EC 3.1.3.13 (phosphatase), but with a reduced activity.	PGAM1_HUMAN	P18669	PGAM1	8
ID_1668		GPDA_HUMAN	P21695	GPD1	8
ID_1672		GPDA_HUMAN	P21695	GPD1	8
ID_1846	Straight-chain enoyl-CoA thioesters from C4 up to at least C16 are processed, although with decreasing catalytic rate.	ECHM_HUMAN	P30084	ECHS1	8
ID_1373	This is a component of the ubiquinol-cytochrome c reductase complex (complex III or cytochrome b-c1 complex), which is part of the mitochondrial respiratory chain. This protein may mediate formation of the complex between cytochromes c and c1.	QCR1_HUMAN	P31930	UQCRC1	8
ID_1490	The 2-oxoglutarate dehydrogenase complex catalyzes the overall conversion of 2-oxoglutarate to succinyl-CoA and CO(2). It contains multiple copies of 3 enzymatic components: 2-oxoglutarate dehydrogenase (E1), dihydrolipoamide succinyltransferase (E2) and lipoamide dehydrogenase (E3).	ODO2_HUMAN	P36957	DLST	8
ID_1726	Forms a channel through the mitochondrial outer membrane that allows diffusion of small hydrophilic molecules. The channel adopts an open conformation at low or zero membrane potential and a closed conformation at potentials above 30-40 mV. The open state has a weak anion selectivity whereas the closed state is cation- selective.	VDAC2_HUMAN	P45880	VDAC2	8
ID_1370	Converts gamma-trimethylaminobutyraldehyde into gamma- butyrobetaine. Catalyzes the irreversible oxidation of a broad range of aldehydes to the corresponding acids in an NAD-dependent reaction.	AL9A1_HUMAN	P49189	ALDH9A1	8
ID_1555		IDH3A_HUMAN	P50213	IDH3A	8
ID_1880		TPIS_HUMAN	P60174	TPI1	8
ID_1884		TPIS_HUMAN	P60174	TPI1	8
ID_2389	Spinorphin: functions as an endogenous inhibitor of enkephalin-degrading enzymes such as DPP3, and as a selective antagonist of the P2RX3 receptor which is involved in pain signaling, these properties implicate it as a regulator of pain and inflammation.	HBB_HUMAN	P68871	HBB	8
ID_0740	The 2-oxoglutarate dehydrogenase complex catalyzes the overall conversion of 2-oxoglutarate to succinyl-CoA and CO(2). It contains multiple copies of three enzymatic components: 2- oxoglutarate dehydrogenase (E1), dihydrolipoamide succinyltransferase (E2) and lipoamide dehydrogenase (E3).	ODO1_HUMAN	Q02218	OGDH	8
ID_0760	The 2-oxoglutarate dehydrogenase complex catalyzes the overall conversion of 2-oxoglutarate to succinyl-CoA and CO(2). It contains multiple copies of three enzymatic components: 2- oxoglutarate dehydrogenase (E1), dihydrolipoamide succinyltransferase (E2) and lipoamide dehydrogenase (E3).	ODO1_HUMAN	Q02218	OGDH	8
ID_0772	The 2-oxoglutarate dehydrogenase complex catalyzes the overall conversion of 2-oxoglutarate to succinyl-CoA and CO(2). It contains multiple copies of three enzymatic components: 2- oxoglutarate dehydrogenase (E1), dihydrolipoamide succinyltransferase (E2) and lipoamide dehydrogenase (E3).	ODO1_HUMAN	Q02218	OGDH	8
ID_1748	Isomerization of 3-trans,5-cis-dienoyl-CoA to 2-trans,4- trans-dienoyl-CoA (By similarity).	ECH1_HUMAN	Q13011	ECH1	8
ID_1964	Has acyl-CoA thioesterase activity towards medium and long-chain (C14 to C18) fatty acyl-CoA substrates, and probably plays an role in mitochondrial fatty acid metabolism. Plays a role in the apoptotic process, possibly via its regulation of AKT1 activity. According to PubMed:11598301, inhibits AKT1 phosphorylation and activity. According to PubMed:17615157, enhances AKT1 activity by favoring its…	THEM4_HUMAN	Q5T1C6	THEM4	8
ID_1582	Hydrolyzes 3-hydroxyisobutyryl-CoA (HIBYL-CoA), a saline catabolite. Has high activity toward isobutyryl-CoA. Could be an isobutyryl-CoA dehydrogenase that functions in valine catabolism. Also hydrolyzes 3-hydroxypropanoyl-CoA.	HIBCH_HUMAN	Q6NVY1	HIBCH	8
ID_1587	Hydrolyzes 3-hydroxyisobutyryl-CoA (HIBYL-CoA), a saline catabolite. Has high activity toward isobutyryl-CoA. Could be an isobutyryl-CoA dehydrogenase that functions in valine catabolism. Also hydrolyzes 3-hydroxypropanoyl-CoA.	HIBCH_HUMAN	Q6NVY1	HIBCH	8
ID_1972	Protects cells against oxidative stress and cell death. Plays a role in regulating expression or stability of the mitochondrial uncoupling proteins SLC25A14 and SLC25A27 in dopaminergic neurons of the substantia nigra pars compacta and attenuates the oxidative stress induced by calcium entry into the neurons via L-type channels during pacemaking. Eliminates hydrogen peroxide and protects cells ag…	PARK7_HUMAN	Q99497	PARK7	8
ID_1553		THIC_HUMAN	Q9BWD1	ACAT2	8
ID_1699		IPYR2_HUMAN	Q9H2U2	PPA2	8
ID_1702			Q9H2U2		8

## Sheet: Dataset_Chaze (MU)
Query	Protein Accession Number	Protein ID	Gene Name
422694	Q15019	SEPT2_HUMAN	SEPT2
422378	Q9NVA2	SEP11_HUMAN	SPET11
8401	P68133	ACTS_HUMAN	ACTA1
8213	P68032	ACTC_HUMAN	ACTC1
26607	Q9P1U1	ARP3B_HUMAN	ACTR3B
10144	Q15848	ADIPO_HUMAN	ADIPOQ
21714	Q8NDY3	ARHL1_HUMAN	ADPRHL1
127854	P02771	FETA_HUMAN	AFP
416588	O43865	SAHH2_HUMAN	AHCYL1
11447	O95433	AHSA1_HUMAN	AHSA1
11898	O00170	AIP_HUMAN	AIP
11979	O60218	AK1BA_HUMAN	AKR1B10
12540	P02768	ALBU_HUMAN	ALB
12359	P49419	AL7A1_HUMAN	ALDH7A1
12370	P49189	AL9A1_HUMAN	ALDH9A1
16376	P04083	ANXA1_HUMAN	ANXA1
16388	P07355	ANXA2_HUMAN	ANXA2
16401	P09525	ANXA4_HUMAN	ANXA4
16408	P08758	ANXA5_HUMAN	ANXA5
17684	P02647	APOA1_HUMAN	APOA1
3611	Q9Y235	ABEC2_HUMAN	APOBEC2
144132	P52565	GDIR1_HUMAN	ARHGDIA
31494	O75947	ATP5H_HUMAN	ATP5H
51302	P47755	CAZA2_HUMAN	CAPZA2
139208	P32239	GASR_HUMAN	CCKBR
455827	P78371	TCPB_HUMAN	CCT2
455860	P48643	TCPE_HUMAN	CCT5
70265	Q9Y281	COF2_HUMAN	CFL2
197718	P06732	KCRM_HUMAN	CKM
63395	O00299	CLIC1_HUMAN	CLIC1
63405	Q9Y696	CLIC4_HUMAN	CLIC4
66810	Q15417	CNN3_HUMAN	CNN3
77117	Q9BT78	CSN4_HUMAN	COPS4
277109	P11182	ODB2_HUMAN	DBT
91027	O94760	DDAH1_HUMAN	DDAH1
91031	O95865	DDAH2_HUMAN	DDAH2
105549	Q13838	DX39B_HUMAN	DDX39B
94575	Q6ICB0	DESI1_HUMAN	DESI1
89198	Q13409	DC1I2_HUMAN	DYNC1I2
113274	Q13347	EIF3I_HUMAN	EIF3I
184727	Q14240	IF4A2_HUMAN	EIF4A2
184877	P63241	IF5A1_HUMAN	EIF5A
115263	P06733	ENOA_HUMAN	ENO1
115278	P13929	ENOB_HUMAN	ENO3
457642	P13726	TF_HUMAN	F3
124744	Q96GK7	FAH2A_HUMAN	FAHD2A
293179	Q8TBF2	PGFS_HUMAN	FAM213B
128374	Q96C11	FGGY_HUMAN	FGGY
129348	Q02790	FKBP4_HUMAN	FKBP4
134616	Q16658	FSCN1_HUMAN	FSCN1
138985	Q14353	GAMT_HUMAN	GAMT
443846	P41250	SYG_HUMAN	GARS
144124	P50395	GDIB_HUMAN	GDI2
144384	P06396	GELS_HUMAN	GSN
164535	Q9H0R4	HDHD2_HUMAN	HDHD2
173893	P31942	HNRH3_HUMAN	HNRNPH3
173916	P61978	HNRPK_HUMAN	HNRNPK
178108	P11142	HSP7C_HUMAN	HSPA8
156824	P38646	GRP75_HUMAN	HSPA9
178218	P04792	HSPB1_HUMAN	HSPB1
178231	O14558	HSPB6_HUMAN	HSPB6
182253	P50213	IDH3A_HUMAN	IDH3A
188757	Q9NPH2	INO1_HUMAN	ISYNA1
205819	P07195	LDHB_HUMAN	LDHB
206346	Q96DT0	LEG12_HUMAN	LGALS12
212987	P02545	LMNA_HUMAN	LMNA
238347	P26038	MOES_HUMAN	MSN
243582	P56278	MTCP1_HUMAN	MTCP1
251740	Q13203	MYBPH_HUMAN	MYBPH
251836	P01106	MYC_HUMAN	MYC
252043	P12882	MYH1_HUMAN	MYH1
252094	P05976	MYL1_HUMAN	MYL1
233663	P10916	MLRV_HUMAN	MYL2
252103	P12829	MYL4_HUMAN	MYL4
252108	P14649	MYL6B_HUMAN	MYL6B
252118	P24844	MYL9_HUMAN	MYL9
233657	Q96A32	MLRS_HUMAN	MYLPF
427853	P54920	SNAA_HUMAN	NAPA
259407	P28331	NDUS1_HUMAN	NDUFS1
288003	P07237	PDIA1_HUMAN	P4HB
282345	Q9UQ80	PA2G4_HUMAN	PA2G4
281889	P68402	PA1B2_HUMAN	PAFAH1B2
285432	Q99497	PARK7_HUMAN	PARK7
288015	P30101	PDIA3_HUMAN	PDIA3
294565	P35232	PHB_HUMAN	PHB
298257	Q8N8W4	PLPL1_HUMAN	PNPLA1
303919	Q08752	PPID_HUMAN	PPID
302822	P62136	PP1A_HUMAN	PPP1CA
302830	P62140	PP1B_HUMAN	PPP1CB
305322	P32119	PRDX2_HUMAN	PRDX2
305349	P30041	PRDX6_HUMAN	PRDX6
196362	P10644	KAP0_HUMAN	PRKAR1A
308111	Q9UMS4	PRP19_HUMAN	PRPF19
309056	P25786	PSA1_HUMAN	PSMA1
309144	P60900	PSA6_HUMAN	PSMA6
310488	Q99436	PSB7_HUMAN	PSMB7
308615	P35998	PRS7_HUMAN	PSMC2
314121	Q06323	PSME1_HUMAN	PSME1
314127	Q9UL46	PSME2_HUMAN	PSME2
315463	Q8N8N7	PTGR2_HUMAN	PTGR2
372908	Q8NHW5	RLA0L_HUMAN	RPLP0P6
413332	Q9Y230	RUVB2_HUMAN	RUVBL2
417669	Q13228	SBP1_HUMAN	SELENBP1
431879	P49903	SPS1_HUMAN	SEPHS1
2150	P01009	A1AT_HUMAN	SERPINA1
428345	Q9UNH7	SNX6_HUMAN	SNX6
435705	P31948	STIP1_HUMAN	STIP1
435813	P16949	STMN1_HUMAN	STMN1
436539	Q9P2R7	SUCB1_HUMAN	SUCLA2
1875	P17987	TCPA_HUMAN	TCP1
464747	P13805	TNNT1_HUMAN	TNNT1
464761	P45378	TNNT3_HUMAN	TNNT3
466414	P60174	TPIS_HUMAN	TPI1
112070	P49411	EFTU_HUMAN	TUFM
480089	Q8TBC4	UBA3_HUMAN	UBA3
325955	P31930	QCR1_HUMAN	UQCRC1
451083	P23381	SYWC_HUMAN	WARS
497844	O75083	WDR1_HUMAN	WDR1
334	P62258	1433E_HUMAN	YWHAE
369	P63104	1433Z_HUMAN	YWHAZ

## Sheet: Cluster 1 - Chaze (MU)
Spot	Protein	UniProt ID	UniProt AC	Gene Name	Cluster
4906	cAMP-dependent protein kinase type I-alpha regulatory subunit [Bos taurus]	KAP0_BOVIN	P00514	PRKAR1A	1
4845	(Myosin heavy chain IIx/d) [Canis familiaris]	Q9BE40_BOVIN	P02769	ALB	1
5310	ATP synthase D chain, mitochondrial (EC 3.6.3.14) [Bos taurus]	AT5F1_BOVIN	P13620	ATP5H	1
4940	Beta-enolase [Bos taurus]	Q3ZC09_BOVIN	P15429	ENO3	1
4945	Tu translation elongation factor, mitochondrial [Bos taurus]	EFTU_BOVIN	P49410	TUFM	1
5226	purine nucleoside phosphorylase [Bos taurus]	PNPH_BOVIN	P55859	PNP / NP	1
5094	Chain A, Crystal Structure Of Dimethylarginine Dimethylaminohydrolase I In Complex With S-Nitroso- Lhomocysteine [Bos taurus]	/	P56965	DDAH1	1
5174	Annexin A5 [Bos taurus]	ANXA5_BOVIN	P81287	ANXA5 / ANX5	1
4965	Similar to Succinyl-CoA ligase [ADP-forming] beta-chain, mitochondrial precursor [Bos taurus]	SUCB2_BOVIN	Q148D5	SUCLA2	1
5057	Isocitrate dehydrogenase 3 (NAD+) alpha [Bos taurus]	IDH3B_BOVIN	Q148J8	IDH3A	1
4817	Aldehyde dehydrogenase family 7 member A1 [Bos taurus]	AL7A1_BOVIN	Q2KJC9	ALDH7A1	1
4842	ALDH9A1 protein [Bos taurus]	AL9A1_BOVIN	Q2KJH9	ALDH9A1	1
4890	Aldehyde dehydrogenase 9 family, member A1 [Bos taurus]	AL9A1_BOVIN	Q2KJH9	ALDH9A1	1
5003	SEPT2 protein [Bos taurus]	/	Q2NKY7	SEPT2	1
4955	serum albumin [Bos indicus]	ALBU_BOVIN	Q3I349	ALB	1
4838	Fascin homolog 1, actin-bundling protein [Bos taurus]	Q3MHK9_BOVIN	Q3MHK9	FSCN1	1
4891	S-adenosylhomocysteine hydrolase [Bos taurus]	/	Q3MHL4	AHCY	1
4947	Eukaryotic translation initiation factor 4A, isoform 2 [Bos taurus]	/	Q3SZ65	EIF4A2	1
5059	ADP-ribosylhydrolase like 1 [Bos taurus]	Q3ZBM1_BOVIN	Q3ZBM1	ADPRHL1 / ARH2	1
5097	Eukaryotic translation initiation factor 3, subunit 2 beta, 36kDa [Bos taurus]	/	Q5E966	EIF3I / EIF3S2	1
5308	peroxiredoxin 2 [Bos taurus]	PRDX2_BOVIN	Q9BGI3	PRDX2	1
4875	Enolase 1 [Bos taurus]	ENOA_BOVIN	Q9XSJ4	ENO1	1

## Sheet: Cluster 8 - Chaze (MU)
Spot	Protein	UniProt ID	UniProt AC	Gene Name	Cluster
5243	albumin [Bos taurus]	/	P02769	ALB	8
4766	protein disulfide-isomerase (EC 5.3.4.1) ER60 precursor [Bos taurus]	PDIA1_BOVIN	P05307	PDIA1	8
4685	Similar to myosin binding protein H [Bos taurus]	/	Q0VBZ1	MYBPH	8
5415	Similar to proteasome (prosome, macropain) subunit, beta type 7 [Bos taurus]	Q2TBP0_BOVIN	Q2TBP0	PSMB7	8
5263	Serum albumin precursor (Allergen Bos d 6) (BSA) [Bos taurus]	ALBU_BOVIN	Q3I349	ALB	8
4658	albumin [Bos taurus]	ALBU_BOVIN	Q3I349	ALB	8
4683	albumin [Bos taurus]	ALBU_BOVIN	Q3I349	ALB	8
4948	albumin [Bos taurus]	ALBU_BOVIN	Q3I349	ALB	8
4950	albumin [Bos taurus]	ALBU_BOVIN	Q3I349	ALB	8
4961	albumin [Bos taurus]	ALBU_BOVIN	Q3I349	ALB	8
4861	Similar to chaperonin containing TCP1, subunit 2 [Bos taurus]	/	Q3ZBH0	CCT2	8
4956	Actin, alpha, cardiac muscle [Bos taurus]	ACTC_BOVIN	Q3ZC07	ACTC1 / ACTC	8
5436	Actin, alpha, cardiac muscle [Bos taurus]	ACTC_BOVIN	Q3ZC07	ACTC1 / ACTC	8
4876	Enolase 1 [Bos taurus]	ENOA_BOVIN	Q9XSJ4	ENO1	8
4877	Enolase 1 [Bos taurus]	ENOA_BOVIN	Q9XSJ4	ENO1	8
4883	Enolase 1 [Bos taurus]	ENOA_BOVIN	Q9XSJ4	ENO1	8

## Sheet: 46 common proteins
Query	Protein Accession Number	Protein ID	Gene Name
334	P62258	1433E_HUMAN	YWHAE
2150	P01009	A1AT_HUMAN	SERPINA1
10144	Q15848	ADIPO_HUMAN	ADIPOQ
12370	P49189	AL9A1_HUMAN	ALDH9A1
12540	P02768	ALBU_HUMAN	ALB
16376	P04083	ANXA1_HUMAN	ANXA1
16401	P09525	ANXA4_HUMAN	ANXA4
16408	P08758	ANXA5_HUMAN	ANXA5
17684	P02647	APOA1_HUMAN	APOA1
31494	O75947	ATP5H_HUMAN	ATP5H
51302	P47755	CAZA2_HUMAN	CAPZA2
63405	Q9Y696	CLIC4_HUMAN	CLIC4
91027	O94760	DDAH1_HUMAN	DDAH1
112070	P49411	EFTU_HUMAN	TUFM
115263	P06733	ENOA_HUMAN	ENO1
127854	P02771	FETA_HUMAN	AFP
128374	Q96C11	FGGY_HUMAN	FGGY
129348	Q02790	FKBP4_HUMAN	FKBP4
139208	P32239	GASR_HUMAN	CCKBR
144124	P50395	GDIB_HUMAN	GDI2
144132	P52565	GDIR1_HUMAN	ARHGDIA
156824	P38646	GRP75_HUMAN	HSPA9
173916	P61978	HNRPK_HUMAN	HNRNPK
178218	P04792	HSPB1_HUMAN	HSPB1
182253	P50213	IDH3A_HUMAN	IDH3A
184877	P63241	IF5A1_HUMAN	EIF5A
205819	P07195	LDHB_HUMAN	LDHB
243582	P56278	MTCP1_HUMAN	MTCP1
259407	P28331	NDUS1_HUMAN	NDUFS1
285432	Q99497	PARK7_HUMAN	PARK7
288015	P30101	PDIA3_HUMAN	PDIA3
294565	P35232	PHB_HUMAN	PHB
298257	Q8N8W4	PLPL1_HUMAN	PNPLA1
305322	P32119	PRDX2_HUMAN	PRDX2
305349	P30041	PRDX6_HUMAN	PRDX6
309056	P25786	PSA1_HUMAN	PSMA1
314121	Q06323	PSME1_HUMAN	PSME1
314127	Q9UL46	PSME2_HUMAN	PSME2
315463	Q8N8N7	PTGR2_HUMAN	PTGR2
325955	P31930	QCR1_HUMAN	UQCRC1
417669	Q13228	SBP1_HUMAN	SELENBP1
422694	Q15019	SEPT2_HUMAN	SEPT2
435705	P31948	STIP1_HUMAN	STIP1
436539	Q9P2R7	SUCB1_HUMAN	SUCLA2
457642	P13726	TF_HUMAN	F3
466414	P60174	TPIS_HUMAN	TPI1
